# Supplementary material
Source: Research Square preprint supplement (doi:10.21203/rs.3.rs-8923363/v1)
Supplement: Supplementary file 1 [file c69786d57018cb3ad86e5dcf.xlsx]

## Sheet: Title
Supplementary Information (including Supplementary Tables 1–4)
Inormative alignment patterns between chemical structure and clinical signals support context-aware toxicity assessment
Hiroto Asano1, Yu-Shi Tian1*, Asuka Hatabu1, Kaori Fukuzawa1, Daisuke Takaya1, Kenji Ikeda1
1Graduate School of Pharmaceutical Sciences, The University of Osaka, 1-6 Yamadaoka, Suita, Osaka 565-0871, Japan
* Corresponding author:
Yu-Shi Tian
Graduate School of Pharmaceutical Sciences, The University of Osaka
1-6 Yamadaoka, Suita City, Osaka 565-0871, Japan
Phone No: +81-6-6879-8242
Fax No: +81-6-6879-8242
Email Address: yushi-tian@phs.osaka-u.ac.jp

## Sheet: Table_S1
Table S1. Drugs classified as Pattern 1 (consistent safety profile: high signal–label and high structure–signal alignment)
ATC level 1	ATC level 3	Drug	Yule's Q (x-axis)	Aligned Coordinate Distance (y-axis)
A, ALIMENTARY TRACT AND METABOLISM	Antiemetics and antinauseants	aprepitant	0.937949	0.315075
A, ALIMENTARY TRACT AND METABOLISM	Antiemetics and antinauseants	dolasetron	0.921714	0.789891
A, ALIMENTARY TRACT AND METABOLISM	Antiemetics and antinauseants	dronabinol	0.930024	0.15005
A, ALIMENTARY TRACT AND METABOLISM	Antiemetics and antinauseants	granisetron	0.806486	0.574466
A, ALIMENTARY TRACT AND METABOLISM	Antiemetics and antinauseants	nabilone	0.945028	0.265448
A, ALIMENTARY TRACT AND METABOLISM	Antiemetics and antinauseants	ondansetron	0.641774	0.464245
A, ALIMENTARY TRACT AND METABOLISM	Antiemetics and antinauseants	palonosetron	0.879674	0.373938
A, ALIMENTARY TRACT AND METABOLISM	Antiobesity	phentermine	0.886424	0.0905074
A, ALIMENTARY TRACT AND METABOLISM	Antiobesity	rimonabant	0.968045	0.184209
A, ALIMENTARY TRACT AND METABOLISM	Antipropulsives	balsalazide	0.902008	0.643315
A, ALIMENTARY TRACT AND METABOLISM	Antipropulsives	sulfasalazine	0.904383	0.284171
A, ALIMENTARY TRACT AND METABOLISM	Belladonna	atropine	0.824538	0.298329
A, ALIMENTARY TRACT AND METABOLISM	Bile therapy	cholic acid	0.918737	0.193978
A, ALIMENTARY TRACT AND METABOLISM	Blood glucose lowering drugs	gliclazide	0.800329	0.407754
A, ALIMENTARY TRACT AND METABOLISM	Blood glucose lowering drugs	glimepiride	0.830712	0.128459
A, ALIMENTARY TRACT AND METABOLISM	Blood glucose lowering drugs	pioglitazone	0.88662	0.239391
A, ALIMENTARY TRACT AND METABOLISM	Blood glucose lowering drugs	repaglinide	0.853547	0.75886
A, ALIMENTARY TRACT AND METABOLISM	Blood glucose lowering drugs	rosiglitazone	0.897735	0.0613176
A, ALIMENTARY TRACT AND METABOLISM	Blood glucose lowering drugs	saxagliptin	0.957769	0.3002
A, ALIMENTARY TRACT AND METABOLISM	Blood glucose lowering drugs	sitagliptin	0.900112	0.135283
A, ALIMENTARY TRACT AND METABOLISM	Blood glucose lowering drugs	vildagliptin	0.903125	0.211809
A, ALIMENTARY TRACT AND METABOLISM	Digestives	citric acid	0.926705	0.192282
A, ALIMENTARY TRACT AND METABOLISM	Drugs for constipation	prucalopride	0.973675	0.0467873
A, ALIMENTARY TRACT AND METABOLISM	Drugs for constipation	tegaserod	0.958298	0.268857
A, ALIMENTARY TRACT AND METABOLISM	Drugs for functional gastrointestinal disorders	alosetron	0.966755	0.416243
A, ALIMENTARY TRACT AND METABOLISM	Drugs for peptic ulcer and reflux	cimetidine	0.740611	0.340559
A, ALIMENTARY TRACT AND METABOLISM	Drugs for peptic ulcer and reflux	famotidine	0.788249	0.269937
A, ALIMENTARY TRACT AND METABOLISM	Drugs for peptic ulcer and reflux	nizatidine	0.850017	0.598535
A, ALIMENTARY TRACT AND METABOLISM	Drugs for peptic ulcer and reflux	omeprazole	0.776107	0.417436
A, ALIMENTARY TRACT AND METABOLISM	Drugs for peptic ulcer and reflux	pantoprazole	0.840191	0.289758
A, ALIMENTARY TRACT AND METABOLISM	Drugs for peptic ulcer and reflux	rabeprazole	0.646483	0.448371
A, ALIMENTARY TRACT AND METABOLISM	Other alimentary	glycerol phenylbutyrate	0.969021	0.29385
A, ALIMENTARY TRACT AND METABOLISM	Other alimentary	nitisinone	0.94567	0.413663
A, ALIMENTARY TRACT AND METABOLISM	Other alimentary	sapropterin	0.991361	0.313233
A, ALIMENTARY TRACT AND METABOLISM	Other minerals	copper	0.843285	0.241541
A, ALIMENTARY TRACT AND METABOLISM	Other minerals	sodium chloride	0.781503	0.373652
A, ALIMENTARY TRACT AND METABOLISM	Other vitamins	vitamin b6	0.412364	0.154112
A, ALIMENTARY TRACT AND METABOLISM	Other vitamins	vitamin e	0.671506	0.216621
A, ALIMENTARY TRACT AND METABOLISM	Propulsives	domperidone	0.827321	0.745277
A, ALIMENTARY TRACT AND METABOLISM	Propulsives	metoclopramide	0.787406	0.220565
A, ALIMENTARY TRACT AND METABOLISM	Stomatological preparations	sodium fluoride	0.716497	0.155736
A, ALIMENTARY TRACT AND METABOLISM	Vitamin A and D	alfacalcidol	0.953072	0.202551
A, ALIMENTARY TRACT AND METABOLISM	Vitamin A and D	vitamin a	0.807654	0.255169
B, BLOOD AND BLOOD FORMING ORGANS	Antithrombotic	bivalirudin	0.979227	0.698219
B, BLOOD AND BLOOD FORMING ORGANS	Antithrombotic	cilostazol	0.876945	0.361105
B, BLOOD AND BLOOD FORMING ORGANS	Antithrombotic	enoxaparin	0.798012	0.201172
B, BLOOD AND BLOOD FORMING ORGANS	Antithrombotic	lepirudin	0.971619	0.421128
B, BLOOD AND BLOOD FORMING ORGANS	Antithrombotic	ticlopidine	0.883218	0.475917
B, BLOOD AND BLOOD FORMING ORGANS	Antithrombotic	warfarin	0.793398	0.606872
B, BLOOD AND BLOOD FORMING ORGANS	Irrigating solutions	sodium bicarbonate	0.851133	0.215281
B, BLOOD AND BLOOD FORMING ORGANS	Solution additives	lysine	0.86858	0.167054
B, BLOOD AND BLOOD FORMING ORGANS	Solution additives	sodium acetate	0.893334	0.729632
C, CARDIOVASCULAR SYSTEM	ACE-Inhibitors	captopril	0.87919	0.118001
C, CARDIOVASCULAR SYSTEM	ACE-Inhibitors	lisinopril	0.806709	0.475358
C, CARDIOVASCULAR SYSTEM	ACE-Inhibitors	perindopril	0.862774	0.184918
C, CARDIOVASCULAR SYSTEM	ACE-Inhibitors	trandolapril	0.918991	0.387608
C, CARDIOVASCULAR SYSTEM	Agents acting on arterial smooth muscle	diazoxide	0.948633	0.524179
C, CARDIOVASCULAR SYSTEM	Agents acting on arterial smooth muscle	hydralazine	0.665782	0.553045
C, CARDIOVASCULAR SYSTEM	Antiadrenergic, peripherically acting	indoramin	0.920656	0.448463
C, CARDIOVASCULAR SYSTEM	Antiarrhythmics I and III	disopyramide	0.974762	0.303253
C, CARDIOVASCULAR SYSTEM	Antiarrhythmics I and III	dofetilide	1	0.0724951
C, CARDIOVASCULAR SYSTEM	Antiarrhythmics I and III	flecainide	0.916882	0.402109
C, CARDIOVASCULAR SYSTEM	Antiarrhythmics I and III	procainamide	0.952161	0.332006
C, CARDIOVASCULAR SYSTEM	Antiarrhythmics I and III	propafenone	0.898624	0.33646
C, CARDIOVASCULAR SYSTEM	Antihemorroids	fluocinonide	0.88169	0.648466
C, CARDIOVASCULAR SYSTEM	Antihemorroids	fluorometholone	0.977848	0.297296
C, CARDIOVASCULAR SYSTEM	Antivaricose	heparin	0.842355	0.315787
C, CARDIOVASCULAR SYSTEM	Antivaricose	polidocanol	1	0.141062
C, CARDIOVASCULAR SYSTEM	ARBs	eprosartan	0.925666	0.429462
C, CARDIOVASCULAR SYSTEM	ARBs	olmesartan	0.838216	0.653114
C, CARDIOVASCULAR SYSTEM	ARBs	telmisartan	0.887855	0.285249
C, CARDIOVASCULAR SYSTEM	ARBs	valsartan	0.783163	0.29524
C, CARDIOVASCULAR SYSTEM	Beta blockers	bisoprolol	0.80197	0.452703
C, CARDIOVASCULAR SYSTEM	Beta blockers	carvedilol	0.85148	0.110639
C, CARDIOVASCULAR SYSTEM	Beta blockers	celiprolol	0.864116	0.49595
C, CARDIOVASCULAR SYSTEM	Beta blockers	labetalol	0.642006	0.492558
C, CARDIOVASCULAR SYSTEM	Beta blockers	metoprolol	0.638592	0.22717
C, CARDIOVASCULAR SYSTEM	Beta blockers	sotalol	0.90938	0.0594406
C, CARDIOVASCULAR SYSTEM	Beta blockers	timolol	0.870375	0.150008
C, CARDIOVASCULAR SYSTEM	Cardiac glycosides	digoxin	0.89189	0.343217
C, CARDIOVASCULAR SYSTEM	Cardiac stimulants	angiotensin ii	0.989985	0.206238
C, CARDIOVASCULAR SYSTEM	Cardiac stimulants	dopamine	0.898555	0.232956
C, CARDIOVASCULAR SYSTEM	Cardiac stimulants	droxidopa	0.956666	0.100741
C, CARDIOVASCULAR SYSTEM	Cardiac stimulants	ephedrine	0.85545	0.395475
C, CARDIOVASCULAR SYSTEM	Cardiac stimulants	midodrine	0.862191	0.51735
C, CARDIOVASCULAR SYSTEM	Cardiac stimulants	norepinephrine	0.954119	0.543836
C, CARDIOVASCULAR SYSTEM	Cardiac stimulants	phenylephrine	0.846198	0.606616
C, CARDIOVASCULAR SYSTEM	High-ceiling diuretics	bumetanide	0.909749	0.241216
C, CARDIOVASCULAR SYSTEM	Lipid modifying agents	atorvastatin	0.758528	0.182389
C, CARDIOVASCULAR SYSTEM	Lipid modifying agents	colestipol	0.667161	0.421873
C, CARDIOVASCULAR SYSTEM	Lipid modifying agents	ezetimibe	0.876732	0.469722
C, CARDIOVASCULAR SYSTEM	Lipid modifying agents	fenofibrate	0.83264	0.212291
C, CARDIOVASCULAR SYSTEM	Lipid modifying agents	gemfibrozil	0.841165	0.145307
C, CARDIOVASCULAR SYSTEM	Lipid modifying agents	pravastatin	0.837079	0.204249
C, CARDIOVASCULAR SYSTEM	Lipid modifying agents	simvastatin	0.837906	0.270909
C, CARDIOVASCULAR SYSTEM	Other antihypertensives	ambrisentan	0.936587	0.586511
C, CARDIOVASCULAR SYSTEM	Other cardiac	alprostadil	0.914175	0.355146
C, CARDIOVASCULAR SYSTEM	Other cardiac	ranolazine	1	0.131841
C, CARDIOVASCULAR SYSTEM	Peripheral vasodilators	phenoxybenzamine	0.897501	0.427049
C, CARDIOVASCULAR SYSTEM	Potassium sparing agents	eplerenone	0.875013	0.490902
C, CARDIOVASCULAR SYSTEM	Selective calcium channel blockers, cardiac	verapamil	0.923623	0.657157
C, CARDIOVASCULAR SYSTEM	Selective calcium channel blockers, vascular	amlodipine	0.833692	0.245161
C, CARDIOVASCULAR SYSTEM	Selective calcium channel blockers, vascular	lercanidipine	0.903215	0.157078
C, CARDIOVASCULAR SYSTEM	Selective calcium channel blockers, vascular	nifedipine	0.696463	0.117153
C, CARDIOVASCULAR SYSTEM	Thiazides	chlorothiazide	0.800299	0.367615
C, CARDIOVASCULAR SYSTEM	Vasodilators	isosorbide dinitrate	0.886342	0.410529
D, DERMATOLOGICALS	Anti-acne, topical	adapalene	0.98926	0.277648
D, DERMATOLOGICALS	Anti-acne, topical	benzoyl peroxide	0.977628	0.146951
D, DERMATOLOGICALS	Antibiotics, topical	retapamulin	0.992225	0.214618
D, DERMATOLOGICALS	Antifungals, topical	griseofulvin	0.992868	0.477148
D, DERMATOLOGICALS	Antipsoriatic, systemic	acitretin	0.917726	0.365004
D, DERMATOLOGICALS	Antipsoriatic, topical	calcitriol	0.67251	0.42577
D, DERMATOLOGICALS	Antiseptics	cetrimide	0.963947	0.202676
D, DERMATOLOGICALS	Antiseptics	chloroxylenol	0.9302	0.68971
D, DERMATOLOGICALS	Antiseptics	ethanol	0.35487	0.379367
D, DERMATOLOGICALS	Antiseptics	hydrogen peroxide	0.979103	0.6175
D, DERMATOLOGICALS	Cicatrizants	dexpanthenol	0.97385	0.15513
D, DERMATOLOGICALS	Corticosteroids	desoximetasone	0.892344	0.149184
D, DERMATOLOGICALS	Corticosteroids	difluprednate	0.927409	0.514524
D, DERMATOLOGICALS	Other dermatological	pimecrolimus	0.909134	0.0613855
G, GENITO URINARY SYSTEM AND SEX HORMONES	Drugs for benign prostatic hypertrophy	alfuzosin	0.820188	0.351891
G, GENITO URINARY SYSTEM AND SEX HORMONES	Drugs for benign prostatic hypertrophy	dutasteride	0.820536	0.24603
G, GENITO URINARY SYSTEM AND SEX HORMONES	Drugs for benign prostatic hypertrophy	finasteride	0.845198	0.148618
G, GENITO URINARY SYSTEM AND SEX HORMONES	Drugs for benign prostatic hypertrophy	silodosin	0.924017	0.77527
G, GENITO URINARY SYSTEM AND SEX HORMONES	Drugs for benign prostatic hypertrophy	tamsulosin	0.847519	0.0725152
G, GENITO URINARY SYSTEM AND SEX HORMONES	Estrogens	estradiol	0.868297	0.516309
G, GENITO URINARY SYSTEM AND SEX HORMONES	Estrogens	tibolone	0.961481	0.66824
G, GENITO URINARY SYSTEM AND SEX HORMONES	Gynecological antiinfectives	clotrimazole	0.870326	0.612855
G, GENITO URINARY SYSTEM AND SEX HORMONES	Gynecological antiinfectives	hexetidine	0.945812	0.329107
G, GENITO URINARY SYSTEM AND SEX HORMONES	Hormonal contraceptives	desogestrel	0.884219	0.460899
G, GENITO URINARY SYSTEM AND SEX HORMONES	Hormonal contraceptives	drospirenone	0.885892	0.273958
G, GENITO URINARY SYSTEM AND SEX HORMONES	Hormonal contraceptives	etonogestrel	0.855589	0.16258
G, GENITO URINARY SYSTEM AND SEX HORMONES	Hormonal contraceptives	levonorgestrel	0.892714	0.75118
G, GENITO URINARY SYSTEM AND SEX HORMONES	Hormonal contraceptives	medroxyprogesterone	0.830206	0.452064
G, GENITO URINARY SYSTEM AND SEX HORMONES	Other gynecologicals	atosiban	0.832953	0.313054
G, GENITO URINARY SYSTEM AND SEX HORMONES	Other gynecologicals	flibanserin	0.991371	0.273064
G, GENITO URINARY SYSTEM AND SEX HORMONES	Other sex hormones	bazedoxifene	0.964016	0.0291903
G, GENITO URINARY SYSTEM AND SEX HORMONES	Other sex hormones	danazol	0.868798	0.428658
G, GENITO URINARY SYSTEM AND SEX HORMONES	Other sex hormones	mifepristone	0.966626	0.113514
G, GENITO URINARY SYSTEM AND SEX HORMONES	Other sex hormones	ospemifene	0.988307	0.303081
G, GENITO URINARY SYSTEM AND SEX HORMONES	Other sex hormones	prasterone	0.938653	0.295606
G, GENITO URINARY SYSTEM AND SEX HORMONES	Other sex hormones	raloxifene	0.838164	0.34904
G, GENITO URINARY SYSTEM AND SEX HORMONES	Progestogens	nomegestrol	0.939816	0.304521
G, GENITO URINARY SYSTEM AND SEX HORMONES	Urologicals	acetohydroxamic acid	0.995146	0.218691
G, GENITO URINARY SYSTEM AND SEX HORMONES	Urologicals	avanafil	0.955831	0.149172
G, GENITO URINARY SYSTEM AND SEX HORMONES	Urologicals	darifenacin	0.928817	0.238623
G, GENITO URINARY SYSTEM AND SEX HORMONES	Uterotonics	carboprost	0.978943	0.122408
G, GENITO URINARY SYSTEM AND SEX HORMONES	Uterotonics	dinoprostone	0.854922	0.158098
H, SYSTEMIC HORMONAL PREPARATIONS, EXCL. SEX HORMONES AND INSULINS	Antiadrenal preparations	ketoconazole	0.826417	0.52403
H, SYSTEMIC HORMONAL PREPARATIONS, EXCL. SEX HORMONES AND INSULINS	Anti-parathyroid agents	paricalcitol	0.820617	0.783287
H, SYSTEMIC HORMONAL PREPARATIONS, EXCL. SEX HORMONES AND INSULINS	Corticosteroids, systemic	hydrocortisone	0.774217	0.779606
H, SYSTEMIC HORMONAL PREPARATIONS, EXCL. SEX HORMONES AND INSULINS	Corticosteroids, systemic	prednisone	0.760581	0.71002
H, SYSTEMIC HORMONAL PREPARATIONS, EXCL. SEX HORMONES AND INSULINS	Corticosteroids, systemic	triamcinolone	0.845784	0.108694
H, SYSTEMIC HORMONAL PREPARATIONS, EXCL. SEX HORMONES AND INSULINS	Hypothalamic hormones	ganirelix	0.966833	0.4895
H, SYSTEMIC HORMONAL PREPARATIONS, EXCL. SEX HORMONES AND INSULINS	Parathyroid hormones	teriparatide	0.878637	0.262217
H, SYSTEMIC HORMONAL PREPARATIONS, EXCL. SEX HORMONES AND INSULINS	Posterior pituitary hormones	oxytocin	0.923756	0.233908
J, ANTIINFECTIVES FOR SYSTEMIC USE	Aminoglycoside	neomycin	0.912302	0.37064
J, ANTIINFECTIVES FOR SYSTEMIC USE	Aminoglycoside	tobramycin	0.820741	0.741891
J, ANTIINFECTIVES FOR SYSTEMIC USE	Antimycotics, systemic	amphotericin b	0.751759	0.379409
J, ANTIINFECTIVES FOR SYSTEMIC USE	Antimycotics, systemic	anidulafungin	0.929778	0.390529
J, ANTIINFECTIVES FOR SYSTEMIC USE	Antimycotics, systemic	caspofungin	0.846895	0.325437
J, ANTIINFECTIVES FOR SYSTEMIC USE	Antimycotics, systemic	flucytosine	0.944945	0.32118
J, ANTIINFECTIVES FOR SYSTEMIC USE	Antimycotics, systemic	itraconazole	0.840102	0.411675
J, ANTIINFECTIVES FOR SYSTEMIC USE	Antimycotics, systemic	micafungin	0.847742	0.299557
J, ANTIINFECTIVES FOR SYSTEMIC USE	Antimycotics, systemic	miconazole	0.819256	0.0548133
J, ANTIINFECTIVES FOR SYSTEMIC USE	Antimycotics, systemic	posaconazole	0.837237	0.22571
J, ANTIINFECTIVES FOR SYSTEMIC USE	Antimycotics, systemic	voriconazole	0.861559	0.316531
J, ANTIINFECTIVES FOR SYSTEMIC USE	Direct acting antivirals	abacavir	0.904304	0.623013
J, ANTIINFECTIVES FOR SYSTEMIC USE	Direct acting antivirals	adefovir	0.902814	0.74356
J, ANTIINFECTIVES FOR SYSTEMIC USE	Direct acting antivirals	atazanavir	0.919471	0.492824
J, ANTIINFECTIVES FOR SYSTEMIC USE	Direct acting antivirals	cidofovir	0.956323	0.26921
J, ANTIINFECTIVES FOR SYSTEMIC USE	Direct acting antivirals	darunavir	0.887128	0.644124
J, ANTIINFECTIVES FOR SYSTEMIC USE	Direct acting antivirals	efavirenz	0.849571	0.82415
J, ANTIINFECTIVES FOR SYSTEMIC USE	Direct acting antivirals	enfuvirtide	0.911676	0.153482
J, ANTIINFECTIVES FOR SYSTEMIC USE	Direct acting antivirals	etravirine	0.942307	0.227424
J, ANTIINFECTIVES FOR SYSTEMIC USE	Direct acting antivirals	foscarnet	0.851892	0.170735
J, ANTIINFECTIVES FOR SYSTEMIC USE	Direct acting antivirals	ganciclovir	0.738168	0.626914
J, ANTIINFECTIVES FOR SYSTEMIC USE	Direct acting antivirals	indinavir	0.903659	0.388207
J, ANTIINFECTIVES FOR SYSTEMIC USE	Direct acting antivirals	lamivudine	0.768475	0.494017
J, ANTIINFECTIVES FOR SYSTEMIC USE	Direct acting antivirals	lopinavir	0.787419	0.279909
J, ANTIINFECTIVES FOR SYSTEMIC USE	Direct acting antivirals	maraviroc	0.920508	0.066274
J, ANTIINFECTIVES FOR SYSTEMIC USE	Direct acting antivirals	oseltamivir	0.930103	0.713061
J, ANTIINFECTIVES FOR SYSTEMIC USE	Direct acting antivirals	raltegravir	0.901597	0.132899
J, ANTIINFECTIVES FOR SYSTEMIC USE	Direct acting antivirals	ribavirin	0.902277	0.184668
J, ANTIINFECTIVES FOR SYSTEMIC USE	Direct acting antivirals	rilpivirine	0.891508	0.0874329
J, ANTIINFECTIVES FOR SYSTEMIC USE	Direct acting antivirals	rimantadine	0.822433	0.498507
J, ANTIINFECTIVES FOR SYSTEMIC USE	Direct acting antivirals	ritonavir	0.756158	0.494594
J, ANTIINFECTIVES FOR SYSTEMIC USE	Direct acting antivirals	saquinavir	0.810885	0.185096
J, ANTIINFECTIVES FOR SYSTEMIC USE	Direct acting antivirals	stavudine	0.959746	0.440406
J, ANTIINFECTIVES FOR SYSTEMIC USE	Direct acting antivirals	valganciclovir	0.695712	0.426401
J, ANTIINFECTIVES FOR SYSTEMIC USE	Direct acting antivirals	zanamivir	0.976067	0.276822
J, ANTIINFECTIVES FOR SYSTEMIC USE	Direct acting antivirals	zidovudine	0.781434	0.282324
J, ANTIINFECTIVES FOR SYSTEMIC USE	Drugs for lepra	dapsone	0.852101	0.36105
J, ANTIINFECTIVES FOR SYSTEMIC USE	Drugs for tuberculosis	cycloserine	0.902726	0.467604
J, ANTIINFECTIVES FOR SYSTEMIC USE	Drugs for tuberculosis	pyrazinamide	0.917817	0.461618
J, ANTIINFECTIVES FOR SYSTEMIC USE	Drugs for tuberculosis	rifapentine	0.98338	0.153295
J, ANTIINFECTIVES FOR SYSTEMIC USE	Macrolides	azithromycin	0.670751	0.236091
J, ANTIINFECTIVES FOR SYSTEMIC USE	Macrolides	clarithromycin	0.919836	0.574663
J, ANTIINFECTIVES FOR SYSTEMIC USE	Macrolides	clindamycin	0.888155	0.443811
J, ANTIINFECTIVES FOR SYSTEMIC USE	Macrolides	telithromycin	0.989887	0.403503
J, ANTIINFECTIVES FOR SYSTEMIC USE	Other antibacterials	colistin	0.747276	0.442527
J, ANTIINFECTIVES FOR SYSTEMIC USE	Other antibacterials	dalbavancin	0.986932	0.489943
J, ANTIINFECTIVES FOR SYSTEMIC USE	Other antibacterials	fosfomycin	0.909801	0.513539
J, ANTIINFECTIVES FOR SYSTEMIC USE	Other antibacterials	metronidazole	0.655289	0.502551
J, ANTIINFECTIVES FOR SYSTEMIC USE	Other antibacterials	nitrofurantoin	0.84528	0.52913
J, ANTIINFECTIVES FOR SYSTEMIC USE	Other antibacterials	oritavancin	0.97385	0.29137
J, ANTIINFECTIVES FOR SYSTEMIC USE	Other antibacterials	telavancin	0.988837	0.477136
J, ANTIINFECTIVES FOR SYSTEMIC USE	Other antibacterials	tinidazole	0.902616	0.235201
J, ANTIINFECTIVES FOR SYSTEMIC USE	Other Beta-lactam	aztreonam	0.955237	0.462629
J, ANTIINFECTIVES FOR SYSTEMIC USE	Other Beta-lactam	cefadroxil	0.936193	0.285211
J, ANTIINFECTIVES FOR SYSTEMIC USE	Other Beta-lactam	cefdinir	0.850817	0.481617
J, ANTIINFECTIVES FOR SYSTEMIC USE	Other Beta-lactam	cefepime	0.862128	0.407859
J, ANTIINFECTIVES FOR SYSTEMIC USE	Other Beta-lactam	cefixime	0.940568	0.383913
J, ANTIINFECTIVES FOR SYSTEMIC USE	Other Beta-lactam	cefotaxime	0.907262	0.39893
J, ANTIINFECTIVES FOR SYSTEMIC USE	Other Beta-lactam	cefoxitin	0.946517	0.291496
J, ANTIINFECTIVES FOR SYSTEMIC USE	Other Beta-lactam	cefprozil	0.957068	0.227608
J, ANTIINFECTIVES FOR SYSTEMIC USE	Other Beta-lactam	ceftazidime	0.889197	0.194801
J, ANTIINFECTIVES FOR SYSTEMIC USE	Other Beta-lactam	ceftibuten	0.961776	0.44685
J, ANTIINFECTIVES FOR SYSTEMIC USE	Other Beta-lactam	ceftriaxone	0.861092	0.359887
J, ANTIINFECTIVES FOR SYSTEMIC USE	Other Beta-lactam	cefuroxime	0.818546	0.280144
J, ANTIINFECTIVES FOR SYSTEMIC USE	Other Beta-lactam	doripenem	0.945348	0.340807
J, ANTIINFECTIVES FOR SYSTEMIC USE	Other Beta-lactam	imipenem	0.877449	0.28015
J, ANTIINFECTIVES FOR SYSTEMIC USE	Other Beta-lactam	meropenem	0.823177	0.478277
J, ANTIINFECTIVES FOR SYSTEMIC USE	Penicillins	amoxicillin	0.826679	0.148868
J, ANTIINFECTIVES FOR SYSTEMIC USE	Penicillins	ampicillin	0.78084	0.113514
J, ANTIINFECTIVES FOR SYSTEMIC USE	Penicillins	dicloxacillin	0.844911	0.180294
J, ANTIINFECTIVES FOR SYSTEMIC USE	Penicillins	oxacillin	0.976195	0.525624
J, ANTIINFECTIVES FOR SYSTEMIC USE	Penicillins	piperacillin	0.823818	0.75892
J, ANTIINFECTIVES FOR SYSTEMIC USE	Penicillins	sulbactam	0.84933	0.248318
J, ANTIINFECTIVES FOR SYSTEMIC USE	Penicillins	tazobactam	0.796046	0.222824
J, ANTIINFECTIVES FOR SYSTEMIC USE	Quinolone	ciprofloxacin	0.752446	0.67048
J, ANTIINFECTIVES FOR SYSTEMIC USE	Quinolone	gatifloxacin	0.926144	0.306063
J, ANTIINFECTIVES FOR SYSTEMIC USE	Quinolone	levofloxacin	0.81289	0.144368
J, ANTIINFECTIVES FOR SYSTEMIC USE	Quinolone	ofloxacin	0.790452	0.329787
J, ANTIINFECTIVES FOR SYSTEMIC USE	Sulfonamides	sulfadiazine	0.907321	0.382783
J, ANTIINFECTIVES FOR SYSTEMIC USE	Sulfonamides	sulfamethoxazole	0.836944	0.329563
L, ANTINEOPLASTIC AND IMMUNOMODULATING AGENTS	Alkylating agents	bendamustine	0.85556	0.33558
L, ANTINEOPLASTIC AND IMMUNOMODULATING AGENTS	Alkylating agents	carmustine	0.829832	0.149995
L, ANTINEOPLASTIC AND IMMUNOMODULATING AGENTS	Alkylating agents	chlorambucil	0.948456	0.226718
L, ANTINEOPLASTIC AND IMMUNOMODULATING AGENTS	Alkylating agents	cyclophosphamide	0.738522	0.0914089
L, ANTINEOPLASTIC AND IMMUNOMODULATING AGENTS	Alkylating agents	dacarbazine	0.885957	0.658209
L, ANTINEOPLASTIC AND IMMUNOMODULATING AGENTS	Alkylating agents	ifosfamide	0.888582	0.148811
L, ANTINEOPLASTIC AND IMMUNOMODULATING AGENTS	Alkylating agents	lomustine	0.965844	0.305883
L, ANTINEOPLASTIC AND IMMUNOMODULATING AGENTS	Alkylating agents	temozolomide	0.917865	0.0354037
L, ANTINEOPLASTIC AND IMMUNOMODULATING AGENTS	Alkylating agents	thiotepa	0.887228	0.17359
L, ANTINEOPLASTIC AND IMMUNOMODULATING AGENTS	Alkylating agents	treosulfan	0.867425	0.193649
L, ANTINEOPLASTIC AND IMMUNOMODULATING AGENTS	Antimetabolites	azacitidine	0.876855	0.131115
L, ANTINEOPLASTIC AND IMMUNOMODULATING AGENTS	Antimetabolites	capecitabine	0.847689	0.429815
L, ANTINEOPLASTIC AND IMMUNOMODULATING AGENTS	Antimetabolites	cladribine	0.858062	0.421743
L, ANTINEOPLASTIC AND IMMUNOMODULATING AGENTS	Antimetabolites	clofarabine	0.945137	0.18567
L, ANTINEOPLASTIC AND IMMUNOMODULATING AGENTS	Antimetabolites	cytarabine	0.681696	0.312673
L, ANTINEOPLASTIC AND IMMUNOMODULATING AGENTS	Antimetabolites	decitabine	0.906323	0.501639
L, ANTINEOPLASTIC AND IMMUNOMODULATING AGENTS	Antimetabolites	fluorouracil	0.840689	0.633041
L, ANTINEOPLASTIC AND IMMUNOMODULATING AGENTS	Antimetabolites	gemcitabine	0.826869	0.40558
L, ANTINEOPLASTIC AND IMMUNOMODULATING AGENTS	Antimetabolites	gimeracil	0.916124	0.299918
L, ANTINEOPLASTIC AND IMMUNOMODULATING AGENTS	Antimetabolites	mercaptopurine	0.872452	0.390454
L, ANTINEOPLASTIC AND IMMUNOMODULATING AGENTS	Cytotoxic antibiotics	daunorubicin	0.801085	0.3441
L, ANTINEOPLASTIC AND IMMUNOMODULATING AGENTS	Cytotoxic antibiotics	idarubicin	0.915377	0.691882
L, ANTINEOPLASTIC AND IMMUNOMODULATING AGENTS	Cytotoxic antibiotics	ixabepilone	0.983032	0.768645
L, ANTINEOPLASTIC AND IMMUNOMODULATING AGENTS	Cytotoxic antibiotics	mitoxantrone	0.833201	0.567168
L, ANTINEOPLASTIC AND IMMUNOMODULATING AGENTS	Cytotoxic antibiotics	valrubicin	0.996077	0.328812
L, ANTINEOPLASTIC AND IMMUNOMODULATING AGENTS	Hormone antagonists	abiraterone	0.911766	0.253142
L, ANTINEOPLASTIC AND IMMUNOMODULATING AGENTS	Hormone antagonists	anastrozole	0.870889	0.283825
L, ANTINEOPLASTIC AND IMMUNOMODULATING AGENTS	Hormone antagonists	bicalutamide	0.888792	0.132771
L, ANTINEOPLASTIC AND IMMUNOMODULATING AGENTS	Hormone antagonists	fulvestrant	0.922323	0.0654388
L, ANTINEOPLASTIC AND IMMUNOMODULATING AGENTS	Hormone antagonists	letrozole	0.852988	0.196387
L, ANTINEOPLASTIC AND IMMUNOMODULATING AGENTS	Hormone antagonists	nilutamide	0.869446	0.0513362
L, ANTINEOPLASTIC AND IMMUNOMODULATING AGENTS	Hormone antagonists	tamoxifen	0.862125	0.306397
L, ANTINEOPLASTIC AND IMMUNOMODULATING AGENTS	Hormone antagonists	toremifene	0.896523	0.201876
L, ANTINEOPLASTIC AND IMMUNOMODULATING AGENTS	Immunosuppressants	lenalidomide	0.852562	0.206922
L, ANTINEOPLASTIC AND IMMUNOMODULATING AGENTS	Immunosuppressants	pirfenidone	0.945226	0.0998694
L, ANTINEOPLASTIC AND IMMUNOMODULATING AGENTS	Other antineoplastic	aminolevulinic acid	0.96195	0.25356
L, ANTINEOPLASTIC AND IMMUNOMODULATING AGENTS	Other antineoplastic	arsenic trioxide	0.972957	0.413731
L, ANTINEOPLASTIC AND IMMUNOMODULATING AGENTS	Other antineoplastic	bexarotene	0.939767	0.528149
L, ANTINEOPLASTIC AND IMMUNOMODULATING AGENTS	Other antineoplastic	celecoxib	0.810671	0.243295
L, ANTINEOPLASTIC AND IMMUNOMODULATING AGENTS	Other antineoplastic	oxaliplatin	0.893678	0.105971
L, ANTINEOPLASTIC AND IMMUNOMODULATING AGENTS	Other antineoplastic	pentostatin	0.858932	0.653178
L, ANTINEOPLASTIC AND IMMUNOMODULATING AGENTS	Other antineoplastic	tretinoin	0.908579	0.154242
L, ANTINEOPLASTIC AND IMMUNOMODULATING AGENTS	Other antineoplastic	vorinostat	0.978444	0.0767317
L, ANTINEOPLASTIC AND IMMUNOMODULATING AGENTS	Plant alkaloids	docetaxel	0.848068	0.473457
L, ANTINEOPLASTIC AND IMMUNOMODULATING AGENTS	Plant alkaloids	irinotecan	0.954091	0.248061
L, ANTINEOPLASTIC AND IMMUNOMODULATING AGENTS	Plant alkaloids	paclitaxel	0.840785	0.144363
L, ANTINEOPLASTIC AND IMMUNOMODULATING AGENTS	Plant alkaloids	topotecan	0.955141	0.204032
L, ANTINEOPLASTIC AND IMMUNOMODULATING AGENTS	Plant alkaloids	trabectedin	0.989941	0.0820122
L, ANTINEOPLASTIC AND IMMUNOMODULATING AGENTS	Plant alkaloids	vinblastine	0.866345	0.620602
L, ANTINEOPLASTIC AND IMMUNOMODULATING AGENTS	Plant alkaloids	vincristine	0.728481	0.308888
L, ANTINEOPLASTIC AND IMMUNOMODULATING AGENTS	Plant alkaloids	vinflunine	0.9862	0.233506
L, ANTINEOPLASTIC AND IMMUNOMODULATING AGENTS	Plant alkaloids	vinorelbine	0.917013	0.28234
L, ANTINEOPLASTIC AND IMMUNOMODULATING AGENTS	Protein kinase inhibitors	bosutinib	0.932538	0.0949255
L, ANTINEOPLASTIC AND IMMUNOMODULATING AGENTS	Protein kinase inhibitors	everolimus	0.866315	0.508066
L, ANTINEOPLASTIC AND IMMUNOMODULATING AGENTS	Protein kinase inhibitors	imatinib	0.830586	0.138767
L, ANTINEOPLASTIC AND IMMUNOMODULATING AGENTS	Protein kinase inhibitors	lapatinib	0.958527	0.379674
L, ANTINEOPLASTIC AND IMMUNOMODULATING AGENTS	Protein kinase inhibitors	sorafenib	0.923592	0.360007
L, ANTINEOPLASTIC AND IMMUNOMODULATING AGENTS	Protein kinase inhibitors	sunitinib	0.897922	0.324354
L, ANTINEOPLASTIC AND IMMUNOMODULATING AGENTS	Protein kinase inhibitors	vandetanib	0.936822	0.60883
M, MUSCULO-SKELETAL SYSTEM	Antigout preparations	febuxostat	0.887636	0.418296
M, MUSCULO-SKELETAL SYSTEM	Antiinflammatory, non steroids	acemetacin	0.727089	0.345693
M, MUSCULO-SKELETAL SYSTEM	Antiinflammatory, non steroids	diclofenac	0.83897	0.473208
M, MUSCULO-SKELETAL SYSTEM	Antiinflammatory, non steroids	fenoprofen	0.963887	0.355392
M, MUSCULO-SKELETAL SYSTEM	Antiinflammatory, non steroids	flurbiprofen	0.868765	0.482564
M, MUSCULO-SKELETAL SYSTEM	Antiinflammatory, non steroids	meloxicam	0.793596	0.195185
M, MUSCULO-SKELETAL SYSTEM	Antiinflammatory, non steroids	naproxen	0.827476	0.213328
M, MUSCULO-SKELETAL SYSTEM	Muscle relaxants, centrally	baclofen	0.870932	0.33304
M, MUSCULO-SKELETAL SYSTEM	Muscle relaxants, centrally	carisoprodol	0.823908	0.198154
M, MUSCULO-SKELETAL SYSTEM	Muscle relaxants, centrally	cyclobenzaprine	0.521618	0.434489
M, MUSCULO-SKELETAL SYSTEM	Muscle relaxants, centrally	tizanidine	0.79502	0.231335
M, MUSCULO-SKELETAL SYSTEM	Muscle relaxants, peripherally	cisatracurium	0.955646	0.180242
M, MUSCULO-SKELETAL SYSTEM	Muscle relaxants, peripherally	mivacurium	0.996118	0.527667
M, MUSCULO-SKELETAL SYSTEM	Muscle relaxants, peripherally	vecuronium	0.959853	0.153053
M, MUSCULO-SKELETAL SYSTEM	Topical products for joint and muscle	capsaicin	0.933431	0.475692
N, NERVOUS SYSTEM	Anesthetics, general	alfentanil	0.942296	0.213852
N, NERVOUS SYSTEM	Anesthetics, general	desflurane	0.962127	0.0440205
N, NERVOUS SYSTEM	Anesthetics, general	esketamine	0.976273	0.111089
N, NERVOUS SYSTEM	Anesthetics, general	etomidate	0.957779	0.220798
N, NERVOUS SYSTEM	Anesthetics, general	fentanyl	0.759099	0.356395
N, NERVOUS SYSTEM	Anesthetics, general	isoflurane	0.956101	0.242239
N, NERVOUS SYSTEM	Anesthetics, general	remifentanil	0.935247	0.0387407
N, NERVOUS SYSTEM	Anesthetics, general	thiopental	0.9352	0.584841
N, NERVOUS SYSTEM	Anesthetics, local	benzocaine	0.828467	0.15243
N, NERVOUS SYSTEM	Anesthetics, local	bupivacaine	0.874028	0.125315
N, NERVOUS SYSTEM	Anesthetics, local	cocaine	0.932859	0.490565
N, NERVOUS SYSTEM	Anesthetics, local	lidocaine	0.711701	0.300878
N, NERVOUS SYSTEM	Anesthetics, local	ropivacaine	0.945603	0.150705
N, NERVOUS SYSTEM	Anticholinergic	procyclidine	0.959736	0.52177
N, NERVOUS SYSTEM	Anticholinergic	trihexyphenidyl	0.927316	0.0822227
N, NERVOUS SYSTEM	Anti-Dementia	donepezil	0.938194	0.320079
N, NERVOUS SYSTEM	Anti-Dementia	galantamine	0.930736	0.3572
N, NERVOUS SYSTEM	Anti-Dementia	memantine	0.892393	0.342041
N, NERVOUS SYSTEM	Anti-Dementia	rivastigmine	0.926533	0.0566284
N, NERVOUS SYSTEM	Antidepressants	amitriptyline	0.803202	0.171254
N, NERVOUS SYSTEM	Antidepressants	amoxapine	0.944337	0.26906
N, NERVOUS SYSTEM	Antidepressants	citalopram	0.889904	0.776583
N, NERVOUS SYSTEM	Antidepressants	clomipramine	0.903227	0.414355
N, NERVOUS SYSTEM	Antidepressants	fluoxetine	0.836884	0.447577
N, NERVOUS SYSTEM	Antidepressants	fluvoxamine	0.934898	0.370003
N, NERVOUS SYSTEM	Antidepressants	imipramine	0.892	0.0983704
N, NERVOUS SYSTEM	Antidepressants	lofepramine	0.960425	0.260406
N, NERVOUS SYSTEM	Antidepressants	milnacipran	0.963031	0.254599
N, NERVOUS SYSTEM	Antidepressants	mirtazapine	0.871552	0.410728
N, NERVOUS SYSTEM	Antidepressants	moclobemide	0.95169	0.359905
N, NERVOUS SYSTEM	Antidepressants	nefazodone	0.903487	0.182278
N, NERVOUS SYSTEM	Antidepressants	paroxetine	0.802655	0.645145
N, NERVOUS SYSTEM	Antidepressants	sertraline	0.846693	0.0542925
N, NERVOUS SYSTEM	Antidepressants	tranylcypromine	0.977864	0.344166
N, NERVOUS SYSTEM	Antidepressants	trazodone	0.866663	0.240391
N, NERVOUS SYSTEM	Antidepressants	venlafaxine	0.859906	0.199334
N, NERVOUS SYSTEM	Antiepileptics	brivaracetam	0.937821	0.0944991
N, NERVOUS SYSTEM	Antiepileptics	clonazepam	0.837646	0.343134
N, NERVOUS SYSTEM	Antiepileptics	felbamate	0.864362	0.242315
N, NERVOUS SYSTEM	Antiepileptics	fenfluramine	0.977167	0.23325
N, NERVOUS SYSTEM	Antiepileptics	lacosamide	0.892205	0.207523
N, NERVOUS SYSTEM	Antiepileptics	lamotrigine	0.820977	0.1924
N, NERVOUS SYSTEM	Antiepileptics	oxcarbazepine	0.828657	0.262782
N, NERVOUS SYSTEM	Antiepileptics	phenobarbital	0.924243	0.126094
N, NERVOUS SYSTEM	Antiepileptics	phenytoin	0.856571	0.153629
N, NERVOUS SYSTEM	Antiepileptics	stiripentol	0.971364	0.307406
N, NERVOUS SYSTEM	Antiepileptics	tiagabine	0.904393	0.269324
N, NERVOUS SYSTEM	Antiepileptics	topiramate	0.846654	0.343562
N, NERVOUS SYSTEM	Antiepileptics	vigabatrin	0.912129	0.209573
N, NERVOUS SYSTEM	Antimigraine	clonidine	0.821209	0.13451
N, NERVOUS SYSTEM	Antimigraine	dihydroergotamine	0.905674	0.0570796
N, NERVOUS SYSTEM	Antimigraine	eletriptan	0.948688	0.257669
N, NERVOUS SYSTEM	Antimigraine	frovatriptan	0.961485	0.0251031
N, NERVOUS SYSTEM	Antipsychotics	aripiprazole	0.830841	0.259146
N, NERVOUS SYSTEM	Antipsychotics	benperidol	0.835708	0.0948141
N, NERVOUS SYSTEM	Antipsychotics	chlorpromazine	0.959334	0.415394
N, NERVOUS SYSTEM	Antipsychotics	clozapine	0.861173	0.0840265
N, NERVOUS SYSTEM	Antipsychotics	fluphenazine	0.939001	0.423665
N, NERVOUS SYSTEM	Antipsychotics	haloperidol	0.901731	0.0718588
N, NERVOUS SYSTEM	Antipsychotics	iloperidone	0.984797	0.0520427
N, NERVOUS SYSTEM	Antipsychotics	lurasidone	0.908509	0.149777
N, NERVOUS SYSTEM	Antipsychotics	molindone	0.995578	0.287946
N, NERVOUS SYSTEM	Antipsychotics	olanzapine	0.855101	0.18845
N, NERVOUS SYSTEM	Antipsychotics	periciazine	0.975591	0.230195
N, NERVOUS SYSTEM	Antipsychotics	prochlorperazine	0.772712	0.101784
N, NERVOUS SYSTEM	Antipsychotics	quetiapine	0.848224	0.0545815
N, NERVOUS SYSTEM	Antipsychotics	risperidone	0.831015	0.0102813
N, NERVOUS SYSTEM	Antipsychotics	sulpiride	0.929327	0.0687511
N, NERVOUS SYSTEM	Antipsychotics	thioridazine	0.955527	0.15224
N, NERVOUS SYSTEM	Antipsychotics	trifluoperazine	0.952629	0.0587181
N, NERVOUS SYSTEM	Antipsychotics	ziprasidone	0.897857	0.172107
N, NERVOUS SYSTEM	Antivertigo	cinnarizine	0.971051	0.240462
N, NERVOUS SYSTEM	Anxiolytics	alprazolam	0.882358	0.158125
N, NERVOUS SYSTEM	Anxiolytics	chlordiazepoxide	0.850828	0.113051
N, NERVOUS SYSTEM	Anxiolytics	diazepam	0.840958	0.252004
N, NERVOUS SYSTEM	Anxiolytics	oxazepam	0.788049	0.198106
N, NERVOUS SYSTEM	Dopaminergic	amantadine	0.904942	0.308528
N, NERVOUS SYSTEM	Dopaminergic	apomorphine	0.976574	0.160795
N, NERVOUS SYSTEM	Dopaminergic	bromocriptine	0.924109	0.212824
N, NERVOUS SYSTEM	Dopaminergic	budipine	0.953874	0.147178
N, NERVOUS SYSTEM	Dopaminergic	cabergoline	0.882681	0.390165
N, NERVOUS SYSTEM	Dopaminergic	carbidopa	0.819993	0.136208
N, NERVOUS SYSTEM	Dopaminergic	entacapone	0.895052	0.10421
N, NERVOUS SYSTEM	Dopaminergic	pramipexole	0.890894	0.128681
N, NERVOUS SYSTEM	Dopaminergic	rasagiline	0.924023	0.372965
N, NERVOUS SYSTEM	Dopaminergic	ropinirole	0.848457	0.29568
N, NERVOUS SYSTEM	Dopaminergic	rotigotine	0.878093	0.119168
N, NERVOUS SYSTEM	Dopaminergic	safinamide	0.915535	0.252202
N, NERVOUS SYSTEM	Drugs for addictive disorders	lofexidine	0.99872	0.545913
N, NERVOUS SYSTEM	Drugs for addictive disorders	methadone	0.8764	0.314745
N, NERVOUS SYSTEM	Drugs for addictive disorders	nalmefene	0.948874	0.280281
N, NERVOUS SYSTEM	Drugs for addictive disorders	nicotine	0.921295	0.13592
N, NERVOUS SYSTEM	Drugs for addictive disorders	varenicline	0.948713	0.167313
N, NERVOUS SYSTEM	Hypnotics and sedatives	butalbital	0.848182	0.362195
N, NERVOUS SYSTEM	Hypnotics and sedatives	dichloralphenazone	0.786746	0.675986
N, NERVOUS SYSTEM	Hypnotics and sedatives	estazolam	0.908053	0.197432
N, NERVOUS SYSTEM	Hypnotics and sedatives	eszopiclone	0.873788	0.0700509
N, NERVOUS SYSTEM	Hypnotics and sedatives	flurazepam	0.937106	0.312056
N, NERVOUS SYSTEM	Hypnotics and sedatives	lormetazepam	0.925126	0.0698899
N, NERVOUS SYSTEM	Hypnotics and sedatives	midazolam	0.871868	0.0899583
N, NERVOUS SYSTEM	Hypnotics and sedatives	nitrazepam	0.944324	0.756518
N, NERVOUS SYSTEM	Hypnotics and sedatives	pentobarbital	0.982251	0.451421
N, NERVOUS SYSTEM	Hypnotics and sedatives	scopolamine	0.831449	0.285111
N, NERVOUS SYSTEM	Hypnotics and sedatives	secobarbital	0.980214	0.174497
N, NERVOUS SYSTEM	Hypnotics and sedatives	zolpidem	0.820428	0.450114
N, NERVOUS SYSTEM	Opioids	morphine	0.843704	0.18769
N, NERVOUS SYSTEM	Opioids	oxymorphone	0.869379	0.0871816
N, NERVOUS SYSTEM	Opioids	tapentadol	0.931834	0.218861
N, NERVOUS SYSTEM	Other analgesics	diflunisal	0.840974	0.206253
N, NERVOUS SYSTEM	Other analgesics	gabapentin	0.858297	0.0323851
N, NERVOUS SYSTEM	Other analgesics	pregabalin	0.860511	0.0313887
N, NERVOUS SYSTEM	Other analgesics	ziconotide	0.966039	0.288693
N, NERVOUS SYSTEM	Other antiparkinson	istradefylline	0.979926	0.240097
N, NERVOUS SYSTEM	Other nervous	riluzole	0.942989	0.132632
N, NERVOUS SYSTEM	Other nervous	tetrabenazine	0.973328	0.158842
N, NERVOUS SYSTEM	Parasympathomimetics	cevimeline	0.850186	0.243557
N, NERVOUS SYSTEM	Psychostimulants	armodafinil	0.941547	0.354672
N, NERVOUS SYSTEM	Psychostimulants	caffeine	0.806996	0.0574603
N, NERVOUS SYSTEM	Psychostimulants	methylphenidate	0.846428	0.147949
N, NERVOUS SYSTEM	Psychostimulants	modafinil	0.838471	0.11843
P, ANTIPARASITIC PRODUCTS, INSECTICIDES AND REPELLENTS	Anti-Leishmaniasis and trypanosomiasis	benznidazole	0.973942	0.174549
P, ANTIPARASITIC PRODUCTS, INSECTICIDES AND REPELLENTS	Anti-Leishmaniasis and trypanosomiasis	eflornithine	0.95486	0.422373
P, ANTIPARASITIC PRODUCTS, INSECTICIDES AND REPELLENTS	Anti-Leishmaniasis and trypanosomiasis	miltefosine	0.983583	0.418805
P, ANTIPARASITIC PRODUCTS, INSECTICIDES AND REPELLENTS	Anti-Leishmaniasis and trypanosomiasis	nifurtimox	0.99485	0.559763
P, ANTIPARASITIC PRODUCTS, INSECTICIDES AND REPELLENTS	Antimalarials	artemether	0.956842	0.338353
P, ANTIPARASITIC PRODUCTS, INSECTICIDES AND REPELLENTS	Antimalarials	artesunate	0.952559	0.781031
P, ANTIPARASITIC PRODUCTS, INSECTICIDES AND REPELLENTS	Antimalarials	chloroquine	0.932689	0.804055
P, ANTIPARASITIC PRODUCTS, INSECTICIDES AND REPELLENTS	Antimalarials	lumefantrine	0.962654	0.195017
P, ANTIPARASITIC PRODUCTS, INSECTICIDES AND REPELLENTS	Antimalarials	mefloquine	0.927616	0.336814
P, ANTIPARASITIC PRODUCTS, INSECTICIDES AND REPELLENTS	Antimalarials	piperaquine	0.979116	0.512105
P, ANTIPARASITIC PRODUCTS, INSECTICIDES AND REPELLENTS	Antimalarials	primaquine	0.969545	0.473678
P, ANTIPARASITIC PRODUCTS, INSECTICIDES AND REPELLENTS	Antimalarials	proguanil	0.96441	0.657762
P, ANTIPARASITIC PRODUCTS, INSECTICIDES AND REPELLENTS	Antimalarials	pyrimethamine	0.938255	0.354598
P, ANTIPARASITIC PRODUCTS, INSECTICIDES AND REPELLENTS	Antimalarials	tafenoquine	0.99135	0.352569
P, ANTIPARASITIC PRODUCTS, INSECTICIDES AND REPELLENTS	Antinematodals	ivermectin	0.991347	0.741618
P, ANTIPARASITIC PRODUCTS, INSECTICIDES AND REPELLENTS	Antinematodals	mebendazole	0.97941	0.108054
P, ANTIPARASITIC PRODUCTS, INSECTICIDES AND REPELLENTS	Antitrematodals	praziquantel	0.955103	0.757433
P, ANTIPARASITIC PRODUCTS, INSECTICIDES AND REPELLENTS	Antitrematodals	triclabendazole	0.996137	0.570419
P, ANTIPARASITIC PRODUCTS, INSECTICIDES AND REPELLENTS	Other anti-protozoals	clioquinol	0.965093	0.239106
R, RESPIRATORY SYSTEM	Adrenergics, inhalant	indacaterol	0.894511	0.285335
R, RESPIRATORY SYSTEM	Adrenergics, inhalant	salmeterol	0.903542	0.249385
R, RESPIRATORY SYSTEM	Antihistamines, systemic	bamipine	0.929372	0.282216
R, RESPIRATORY SYSTEM	Antihistamines, systemic	cyclizine	0.912857	0.18779
R, RESPIRATORY SYSTEM	Antihistamines, systemic	desloratadine	0.90957	0.163179
R, RESPIRATORY SYSTEM	Antihistamines, systemic	dexchlorpheniramine	0.887243	0.56606
R, RESPIRATORY SYSTEM	Antihistamines, systemic	doxylamine	0.656234	0.100011
R, RESPIRATORY SYSTEM	Antihistamines, systemic	rupatadine	0.878016	0.0655615
R, RESPIRATORY SYSTEM	Cough suppressants	benzonatate	0.898877	0.55011
R, RESPIRATORY SYSTEM	Cough suppressants	dextromethorphan	0.878488	0.307121
R, RESPIRATORY SYSTEM	Cough suppressants	pholcodine	0.884117	0.458541
R, RESPIRATORY SYSTEM	Decongestans, systemic	phenylpropanolamine	0.933239	0.144095
R, RESPIRATORY SYSTEM	Decongestans, topical	azelastine	0.936833	0.246942
R, RESPIRATORY SYSTEM	Decongestans, topical	olopatadine	0.922015	0.0816995
R, RESPIRATORY SYSTEM	Decongestans, topical	oxymetazoline	0.946479	0.247878
R, RESPIRATORY SYSTEM	Decongestans, topical	xylometazoline	0.917502	0.828056
R, RESPIRATORY SYSTEM	Expectorants	acetylcysteine	0.84177	0.378706
R, RESPIRATORY SYSTEM	Expectorants	guaifenesin	0.771259	0.231184
R, RESPIRATORY SYSTEM	Other drugs for obstructive diseases	roflumilast	0.956064	0.0741252
S, SENSORY ORGANS	Antiglaucoma	acetazolamide	0.887318	0.256779
S, SENSORY ORGANS	Antiglaucoma	brinzolamide	0.924016	0.22552
S, SENSORY ORGANS	Antiglaucoma	latanoprost	0.935617	0.252301
S, SENSORY ORGANS	Antiinfectives	trifluridine	0.922206	0.150355
S, SENSORY ORGANS	Mydriatics	cyclopentolate	0.957107	0.314968
S, SENSORY ORGANS	Mydriatics	homatropine	0.736148	0.160301
S, SENSORY ORGANS	Mydriatics	tropicamide	1	0.341127
S, SENSORY ORGANS	Ocular vascular agents	verteporfin	0.952222	0.140915
V, VARIOUS	All other therapeutics	colestilan	0.954873	0.149938
V, VARIOUS	All other therapeutics	deferasirox	0.90708	0.253769
V, VARIOUS	All other therapeutics	flumazenil	0.896743	0.193511
V, VARIOUS	All other therapeutics	lanthanum carbonate	0.921786	0.222498
V, VARIOUS	All other therapeutics	methionine	0.885813	0.395093
V, VARIOUS	All other therapeutics	sevelamer	0.925121	0.538925
V, VARIOUS	Other diagnostics	metyrapone	0.966329	0.227239
V, VARIOUS	Other nutrients	arginine	0.892612	0.70446
V, VARIOUS	Other nutrients	histidine	0.833507	0.166337
V, VARIOUS	Other nutrients	leucine	0.877518	0.486714
V, VARIOUS	Other nutrients	phenylalanine	0.829158	0.0750057
V, VARIOUS	Other nutrients	threonine	0.833071	0.21727
V, VARIOUS	Other nutrients	tyrosine	0.83416	0.122265
V, VARIOUS	Other nutrients	valine	0.833725	0.186028
V, VARIOUS	Ultrasound contrast media	perflutren	0.989638	0.198232
V, VARIOUS	Ultrasound contrast media	sulfur hexafluoride	0.985874	0.2518
V, VARIOUS	X-ray contrast media, iodinated	iopamidol	0.968428	0.161914

## Sheet: Table_S2
Table S2. Drugs classified as Pattern 2 (individual biology–driven risk: high signal–label but low structure–signal alignment)
ATC level 1	ATC level 3	Drug	Yule's Q (x-axis)	Aligned Coordinate Distance (y-axis)
A, ALIMENTARY TRACT AND METABOLISM	Antacids	calcium carbonate	0.890049	2.76534
A, ALIMENTARY TRACT AND METABOLISM	Antiobesity	orlistat	0.951597	2.66494
A, ALIMENTARY TRACT AND METABOLISM	Antipropulsives	olsalazine	0.877359	1.50937
A, ALIMENTARY TRACT AND METABOLISM	Belladonna	butylscopolamine	0.585663	2.28003
A, ALIMENTARY TRACT AND METABOLISM	Blood glucose lowering drugs	acarbose	0.921994	1.08862
A, ALIMENTARY TRACT AND METABOLISM	Blood glucose lowering drugs	glipizide	0.816111	2.05134
A, ALIMENTARY TRACT AND METABOLISM	Blood glucose lowering drugs	metformin	0.86275	1.53335
A, ALIMENTARY TRACT AND METABOLISM	Blood glucose lowering drugs	nateglinide	0.916739	1.65143
A, ALIMENTARY TRACT AND METABOLISM	Blood glucose lowering drugs	tolbutamide	0.939962	2.87407
A, ALIMENTARY TRACT AND METABOLISM	Drugs for constipation	bisacodyl	0.867939	2.91917
A, ALIMENTARY TRACT AND METABOLISM	Drugs for constipation	docusate	0.695239	2.04582
A, ALIMENTARY TRACT AND METABOLISM	Drugs for constipation	lactulose	0.885703	2.1161
A, ALIMENTARY TRACT AND METABOLISM	Drugs for constipation	methylnaltrexone	0.98553	3.54112
A, ALIMENTARY TRACT AND METABOLISM	Drugs for constipation	sodium sulfate	0.946112	4.03175
A, ALIMENTARY TRACT AND METABOLISM	Drugs for functional gastrointestinal disorders	isometheptene	0.865442	6.36442
A, ALIMENTARY TRACT AND METABOLISM	Drugs for peptic ulcer and reflux	esomeprazole	0.699244	1.51957
A, ALIMENTARY TRACT AND METABOLISM	Electrolytes with carbohydrates	difenoxin	0.995508	4.43703
A, ALIMENTARY TRACT AND METABOLISM	Electrolytes with carbohydrates	diphenoxylate	1	2.34325
A, ALIMENTARY TRACT AND METABOLISM	Electrolytes with carbohydrates	loperamide	0.793339	1.23481
A, ALIMENTARY TRACT AND METABOLISM	Other alimentary	betaine	0.924069	6.20533
A, ALIMENTARY TRACT AND METABOLISM	Other alimentary	lonafarnib	0.964427	4.52816
A, ALIMENTARY TRACT AND METABOLISM	Other alimentary	miglustat	0.925208	4.13322
A, ALIMENTARY TRACT AND METABOLISM	Other alimentary	trientine	0.983891	2.99341
A, ALIMENTARY TRACT AND METABOLISM	Other alimentary	triheptanoin	1	1.65087
A, ALIMENTARY TRACT AND METABOLISM	Vitamin A and D	vitamin d3	0.365585	4.15438
B, BLOOD AND BLOOD FORMING ORGANS	Antifibrinolytics	tranexamic acid	0.596283	2.8381
B, BLOOD AND BLOOD FORMING ORGANS	Antithrombotic	acenocoumarol	0.788663	2.02277
B, BLOOD AND BLOOD FORMING ORGANS	Antithrombotic	apixaban	0.93035	2.00203
B, BLOOD AND BLOOD FORMING ORGANS	Antithrombotic	clopidogrel	0.833731	3.57821
B, BLOOD AND BLOOD FORMING ORGANS	Antithrombotic	dipyridamole	0.669764	1.1011
B, BLOOD AND BLOOD FORMING ORGANS	Antithrombotic	epoprostenol	0.92898	3.27785
B, BLOOD AND BLOOD FORMING ORGANS	Antithrombotic	eptifibatide	0.946705	2.67573
B, BLOOD AND BLOOD FORMING ORGANS	Antithrombotic	prasugrel	0.94475	1.99391
B, BLOOD AND BLOOD FORMING ORGANS	Antithrombotic	rivaroxaban	0.804875	2.0381
B, BLOOD AND BLOOD FORMING ORGANS	Irrigating solutions	glucose	0.82546	4.0358
B, BLOOD AND BLOOD FORMING ORGANS	Irrigating solutions	glycine	0.820935	1.64154
B, BLOOD AND BLOOD FORMING ORGANS	Irrigating solutions	sorbitol	0.914728	1.50573
B, BLOOD AND BLOOD FORMING ORGANS	Other hematological	hemin	0.975987	2.43576
B, BLOOD AND BLOOD FORMING ORGANS	Solution additives	potassium phosphate	0.643021	1.54561
B, BLOOD AND BLOOD FORMING ORGANS	Vitamin K	eltrombopag	0.894683	2.59228
C, CARDIOVASCULAR SYSTEM	ACE-Inhibitors	benazepril	0.845433	1.65635
C, CARDIOVASCULAR SYSTEM	ACE-Inhibitors	fosinopril	0.864698	1.73861
C, CARDIOVASCULAR SYSTEM	ACE-Inhibitors	moexipril	0.928615	1.78369
C, CARDIOVASCULAR SYSTEM	ACE-Inhibitors	quinapril	0.739053	3.48201
C, CARDIOVASCULAR SYSTEM	ACE-Inhibitors	ramipril	0.809623	4.73445
C, CARDIOVASCULAR SYSTEM	Agents acting on arterial smooth muscle	minoxidil	0.906147	3.99687
C, CARDIOVASCULAR SYSTEM	Antiadrenergic, centrally acting	guanfacine	0.956273	4.32731
C, CARDIOVASCULAR SYSTEM	Antiadrenergic, centrally acting	methyldopa	0.682234	3.61145
C, CARDIOVASCULAR SYSTEM	Antiadrenergic, peripherically acting	doxazosin	0.781286	2.04455
C, CARDIOVASCULAR SYSTEM	Antiarrhythmics I and III	amiodarone	0.836696	2.18284
C, CARDIOVASCULAR SYSTEM	Antiarrhythmics I and III	dronedarone	0.95521	2.15326
C, CARDIOVASCULAR SYSTEM	Antiarrhythmics I and III	mexiletine	0.914466	2.90972
C, CARDIOVASCULAR SYSTEM	Antihemorroids	diltiazem	0.792771	2.97844
C, CARDIOVASCULAR SYSTEM	Antivaricose	pentosan polysulfate	0.744185	1.29656
C, CARDIOVASCULAR SYSTEM	Antivaricose	sodium tetradecyl sulfate	0.994256	5.60016
C, CARDIOVASCULAR SYSTEM	ARBs	candesartan	0.815902	2.03577
C, CARDIOVASCULAR SYSTEM	ARBs	irbesartan	0.834856	1.75902
C, CARDIOVASCULAR SYSTEM	ARBs	losartan	0.863293	2.19249
C, CARDIOVASCULAR SYSTEM	Beta blockers	acebutolol	0.872208	2.72134
C, CARDIOVASCULAR SYSTEM	Beta blockers	betaxolol	0.870305	2.00557
C, CARDIOVASCULAR SYSTEM	Beta blockers	carteolol	0.931808	2.2943
C, CARDIOVASCULAR SYSTEM	Beta blockers	nadolol	0.905423	2.5493
C, CARDIOVASCULAR SYSTEM	Beta blockers	propranolol	0.840431	3.81517
C, CARDIOVASCULAR SYSTEM	Cardiac stimulants	dobutamine	0.940079	1.56484
C, CARDIOVASCULAR SYSTEM	Cardiac stimulants	epinephrine	0.799355	3.10059
C, CARDIOVASCULAR SYSTEM	Cardiac stimulants	metaraminol	0.902955	3.98686
C, CARDIOVASCULAR SYSTEM	High-ceiling diuretics	furosemide	0.798709	1.89981
C, CARDIOVASCULAR SYSTEM	Lipid modifying agents	lovastatin	0.917799	2.04622
C, CARDIOVASCULAR SYSTEM	Lipid modifying agents	pitavastatin	0.928975	2.46041
C, CARDIOVASCULAR SYSTEM	Lipid modifying agents	rosuvastatin	0.86145	1.93346
C, CARDIOVASCULAR SYSTEM	Other agents acting on the renin-angiotensin system	aliskiren	0.885435	1.39812
C, CARDIOVASCULAR SYSTEM	Other antihypertensives	bosentan	0.897974	3.18755
C, CARDIOVASCULAR SYSTEM	Other cardiac	adenosine	0.939497	2.88388
C, CARDIOVASCULAR SYSTEM	Other cardiac	ivabradine	0.935831	1.41895
C, CARDIOVASCULAR SYSTEM	Other cardiac	ubidecarenone	0.734278	4.8402
C, CARDIOVASCULAR SYSTEM	Other diuretics	tolvaptan	0.862906	2.10715
C, CARDIOVASCULAR SYSTEM	Other low-ceiling diuretics	indapamide	0.885168	2.33267
C, CARDIOVASCULAR SYSTEM	Other low-ceiling diuretics	metolazone	0.796113	2.53168
C, CARDIOVASCULAR SYSTEM	Peripheral vasodilators	pentoxifylline	0.933699	1.11817
C, CARDIOVASCULAR SYSTEM	Peripheral vasodilators	phentolamine	0.937135	4.42546
C, CARDIOVASCULAR SYSTEM	Potassium sparing agents	amiloride	0.913597	3.51613
C, CARDIOVASCULAR SYSTEM	Potassium sparing agents	spironolactone	0.802194	4.65113
C, CARDIOVASCULAR SYSTEM	Potassium sparing agents	triamterene	0.68772	2.37116
C, CARDIOVASCULAR SYSTEM	Selective calcium channel blockers, vascular	isradipine	0.879317	2.16173
C, CARDIOVASCULAR SYSTEM	Selective calcium channel blockers, vascular	lacidipine	0.966443	1.65849
C, CARDIOVASCULAR SYSTEM	Selective calcium channel blockers, vascular	nicardipine	0.630567	2.38361
C, CARDIOVASCULAR SYSTEM	Selective calcium channel blockers, vascular	nimodipine	0.915178	1.37012
C, CARDIOVASCULAR SYSTEM	Thiazides	bendroflumethiazide	0.926953	2.52458
C, CARDIOVASCULAR SYSTEM	Thiazides	hydrochlorothiazide	0.818034	3.24509
D, DERMATOLOGICALS	Anti-acne, topical	isotretinoin	0.813968	4.91061
D, DERMATOLOGICALS	Anti-acne, topical	sulfacetamide	0.964216	3.93358
D, DERMATOLOGICALS	Anti-acne, topical	sulfur	0.925028	3.18324
D, DERMATOLOGICALS	Antibiotics, topical	rifaximin	0.858436	3.97712
D, DERMATOLOGICALS	Antifungals, topical	salicylic acid	0.832585	3.51104
D, DERMATOLOGICALS	Antifungals, topical	terbinafine	0.911348	1.79146
D, DERMATOLOGICALS	Antipsoriatic, topical	methoxsalen	0.871586	2.26003
D, DERMATOLOGICALS	Antipsoriatic, topical	tazarotene	0.991483	2.76719
D, DERMATOLOGICALS	Chemotherapeutics, topical	imiquimod	0.958064	3.80298
D, DERMATOLOGICALS	Chemotherapeutics, topical	silver sulfadiazine	0.960826	2.78124
D, DERMATOLOGICALS	Corticosteroids	desonide	0.952874	2.17149
D, DERMATOLOGICALS	Corticosteroids	diflorasone	0.941251	2.71172
D, DERMATOLOGICALS	Other dermatological	hydroquinone	0.9796	2.74217
G, GENITO URINARY SYSTEM AND SEX HORMONES	Androgens	testosterone	0.847084	1.62841
G, GENITO URINARY SYSTEM AND SEX HORMONES	Drugs for benign prostatic hypertrophy	terazosin	0.91293	1.90625
G, GENITO URINARY SYSTEM AND SEX HORMONES	Estrogens	estriol	0.947116	4.89808
G, GENITO URINARY SYSTEM AND SEX HORMONES	Gynecological antiinfectives	oxiconazole	0.98036	2.11434
G, GENITO URINARY SYSTEM AND SEX HORMONES	Gynecological antiinfectives	terconazole	0.747988	3.34906
G, GENITO URINARY SYSTEM AND SEX HORMONES	Hormonal contraceptives	megestrol	0.806018	3.93265
G, GENITO URINARY SYSTEM AND SEX HORMONES	Hormonal contraceptives	norelgestromin	0.950936	4.865
G, GENITO URINARY SYSTEM AND SEX HORMONES	Hormonal contraceptives	norgestimate	0.946237	2.70364
G, GENITO URINARY SYSTEM AND SEX HORMONES	Progestogens	dienogest	0.941185	2.63098
G, GENITO URINARY SYSTEM AND SEX HORMONES	Progestogens	progesterone	0.888375	2.70444
G, GENITO URINARY SYSTEM AND SEX HORMONES	Progestogens and estrogens	norgestrel	0.942464	3.41465
G, GENITO URINARY SYSTEM AND SEX HORMONES	Urologicals	flavoxate	0.906401	3.65074
G, GENITO URINARY SYSTEM AND SEX HORMONES	Urologicals	sildenafil	0.892103	1.86214
G, GENITO URINARY SYSTEM AND SEX HORMONES	Urologicals	tadalafil	0.909735	3.33807
G, GENITO URINARY SYSTEM AND SEX HORMONES	Urologicals	tiopronin	0.970932	2.18945
G, GENITO URINARY SYSTEM AND SEX HORMONES	Urologicals	tolterodine	0.908635	1.79841
G, GENITO URINARY SYSTEM AND SEX HORMONES	Urologicals	vardenafil	0.935872	1.85646
G, GENITO URINARY SYSTEM AND SEX HORMONES	Uterotonics	dinoprost	0.965053	3.58945
H, SYSTEMIC HORMONAL PREPARATIONS, EXCL. SEX HORMONES AND INSULINS	Anti-parathyroid agents	cinacalcet	0.876545	3.48371
H, SYSTEMIC HORMONAL PREPARATIONS, EXCL. SEX HORMONES AND INSULINS	Anti-parathyroid agents	doxercalciferol	0.925575	3.27184
H, SYSTEMIC HORMONAL PREPARATIONS, EXCL. SEX HORMONES AND INSULINS	Antithyroid preparations	carbimazole	0.877759	2.44796
H, SYSTEMIC HORMONAL PREPARATIONS, EXCL. SEX HORMONES AND INSULINS	Antithyroid preparations	propylthiouracil	0.923578	4.24536
H, SYSTEMIC HORMONAL PREPARATIONS, EXCL. SEX HORMONES AND INSULINS	Corticosteroids, systemic	betamethasone	0.78569	4.34268
H, SYSTEMIC HORMONAL PREPARATIONS, EXCL. SEX HORMONES AND INSULINS	Corticosteroids, systemic	cortisone	0.884397	2.50333
H, SYSTEMIC HORMONAL PREPARATIONS, EXCL. SEX HORMONES AND INSULINS	Corticosteroids, systemic	dexamethasone	0.668176	5.04365
H, SYSTEMIC HORMONAL PREPARATIONS, EXCL. SEX HORMONES AND INSULINS	Corticosteroids, systemic	fludrocortisone	0.786534	3.62932
H, SYSTEMIC HORMONAL PREPARATIONS, EXCL. SEX HORMONES AND INSULINS	Corticosteroids, systemic	methylprednisolone	0.675971	4.98699
H, SYSTEMIC HORMONAL PREPARATIONS, EXCL. SEX HORMONES AND INSULINS	Corticosteroids, systemic	prednisolone	0.645637	5.2526
H, SYSTEMIC HORMONAL PREPARATIONS, EXCL. SEX HORMONES AND INSULINS	Hypothalamic hormones	cetrorelix	0.936116	2.05589
H, SYSTEMIC HORMONAL PREPARATIONS, EXCL. SEX HORMONES AND INSULINS	Hypothalamic hormones	nafarelin	0.974392	2.81635
H, SYSTEMIC HORMONAL PREPARATIONS, EXCL. SEX HORMONES AND INSULINS	Hypothalamic hormones	octreotide	0.911979	3.76036
H, SYSTEMIC HORMONAL PREPARATIONS, EXCL. SEX HORMONES AND INSULINS	Posterior pituitary hormones	desmopressin	0.883824	5.0702
H, SYSTEMIC HORMONAL PREPARATIONS, EXCL. SEX HORMONES AND INSULINS	Posterior pituitary hormones	terlipressin	0.934383	4.64808
H, SYSTEMIC HORMONAL PREPARATIONS, EXCL. SEX HORMONES AND INSULINS	Thyroid preparations	levothyroxine	0.867404	2.65299
J, ANTIINFECTIVES FOR SYSTEMIC USE	Aminoglycoside	amikacin	0.886775	1.66727
J, ANTIINFECTIVES FOR SYSTEMIC USE	Aminoglycoside	gentamicin	0.849725	1.58782
J, ANTIINFECTIVES FOR SYSTEMIC USE	Aminoglycoside	streptomycin	0.94934	3.32333
J, ANTIINFECTIVES FOR SYSTEMIC USE	Amphenicols	chloramphenicol	0.744914	2.25318
J, ANTIINFECTIVES FOR SYSTEMIC USE	Antimycotics, systemic	fluconazole	0.80016	2.54346
J, ANTIINFECTIVES FOR SYSTEMIC USE	Direct acting antivirals	didanosine	0.866694	1.66797
J, ANTIINFECTIVES FOR SYSTEMIC USE	Direct acting antivirals	emtricitabine	0.741854	2.25998
J, ANTIINFECTIVES FOR SYSTEMIC USE	Direct acting antivirals	entecavir	0.862963	1.45162
J, ANTIINFECTIVES FOR SYSTEMIC USE	Direct acting antivirals	famciclovir	0.786323	2.79289
J, ANTIINFECTIVES FOR SYSTEMIC USE	Direct acting antivirals	fosamprenavir	0.959241	1.93077
J, ANTIINFECTIVES FOR SYSTEMIC USE	Direct acting antivirals	nelfinavir	0.83435	3.27963
J, ANTIINFECTIVES FOR SYSTEMIC USE	Direct acting antivirals	nevirapine	0.782769	2.02327
J, ANTIINFECTIVES FOR SYSTEMIC USE	Direct acting antivirals	penciclovir	0.994372	3.07489
J, ANTIINFECTIVES FOR SYSTEMIC USE	Direct acting antivirals	tipranavir	0.913485	2.1978
J, ANTIINFECTIVES FOR SYSTEMIC USE	Drugs for tuberculosis	ethambutol	0.899075	2.72199
J, ANTIINFECTIVES FOR SYSTEMIC USE	Drugs for tuberculosis	isoniazid	0.925611	2.29962
J, ANTIINFECTIVES FOR SYSTEMIC USE	Drugs for tuberculosis	rifabutin	0.958662	1.28602
J, ANTIINFECTIVES FOR SYSTEMIC USE	Macrolides	erythromycin	0.883691	3.94592
J, ANTIINFECTIVES FOR SYSTEMIC USE	Macrolides	lincomycin	0.980732	1.72155
J, ANTIINFECTIVES FOR SYSTEMIC USE	Other antibacterials	bacitracin	0.854927	1.64465
J, ANTIINFECTIVES FOR SYSTEMIC USE	Other antibacterials	daptomycin	0.882322	2.27989
J, ANTIINFECTIVES FOR SYSTEMIC USE	Other antibacterials	linezolid	0.90251	2.7344
J, ANTIINFECTIVES FOR SYSTEMIC USE	Other antibacterials	methenamine	0.876815	3.66687
J, ANTIINFECTIVES FOR SYSTEMIC USE	Other antibacterials	vancomycin	0.809021	4.66101
J, ANTIINFECTIVES FOR SYSTEMIC USE	Other Beta-lactam	cefaclor	0.967757	2.25352
J, ANTIINFECTIVES FOR SYSTEMIC USE	Other Beta-lactam	cefazolin	0.831368	2.16883
J, ANTIINFECTIVES FOR SYSTEMIC USE	Other Beta-lactam	cefditoren	0.916528	1.56096
J, ANTIINFECTIVES FOR SYSTEMIC USE	Other Beta-lactam	cefpodoxime	0.922154	3.90524
J, ANTIINFECTIVES FOR SYSTEMIC USE	Other Beta-lactam	ertapenem	0.909522	3.97017
J, ANTIINFECTIVES FOR SYSTEMIC USE	Penicillins	cloxacillin	0.981239	1.78013
J, ANTIINFECTIVES FOR SYSTEMIC USE	Quinolone	gemifloxacin	1	2.91549
J, ANTIINFECTIVES FOR SYSTEMIC USE	Quinolone	moxifloxacin	0.855291	1.64
J, ANTIINFECTIVES FOR SYSTEMIC USE	Sulfonamides	trimethoprim	0.866544	2.54243
J, ANTIINFECTIVES FOR SYSTEMIC USE	Tetracyclines	demeclocycline	0.904914	5.11482
J, ANTIINFECTIVES FOR SYSTEMIC USE	Tetracyclines	doxycycline	0.870744	7.50537
J, ANTIINFECTIVES FOR SYSTEMIC USE	Tetracyclines	tetracycline	0.865798	4.60369
L, ANTINEOPLASTIC AND IMMUNOMODULATING AGENTS	Alkylating agents	busulfan	0.852468	2.59228
L, ANTINEOPLASTIC AND IMMUNOMODULATING AGENTS	Alkylating agents	melphalan	0.735836	2.71323
L, ANTINEOPLASTIC AND IMMUNOMODULATING AGENTS	Antimetabolites	fludarabine	0.899177	2.27629
L, ANTINEOPLASTIC AND IMMUNOMODULATING AGENTS	Antimetabolites	methotrexate	0.667285	4.47608
L, ANTINEOPLASTIC AND IMMUNOMODULATING AGENTS	Antimetabolites	pemetrexed	0.942588	4.66658
L, ANTINEOPLASTIC AND IMMUNOMODULATING AGENTS	Antimetabolites	tegafur	0.91832	5.05407
L, ANTINEOPLASTIC AND IMMUNOMODULATING AGENTS	Cytotoxic antibiotics	dactinomycin	0.943038	2.54682
L, ANTINEOPLASTIC AND IMMUNOMODULATING AGENTS	Cytotoxic antibiotics	doxorubicin	0.726713	2.52918
L, ANTINEOPLASTIC AND IMMUNOMODULATING AGENTS	Cytotoxic antibiotics	epirubicin	0.903746	5.0193
L, ANTINEOPLASTIC AND IMMUNOMODULATING AGENTS	Cytotoxic antibiotics	mitomycin	0.966726	2.56457
L, ANTINEOPLASTIC AND IMMUNOMODULATING AGENTS	Hormone antagonists	flutamide	0.920518	3.18015
L, ANTINEOPLASTIC AND IMMUNOMODULATING AGENTS	Hormones	buserelin	0.88013	1.64703
L, ANTINEOPLASTIC AND IMMUNOMODULATING AGENTS	Hormones	histrelin	0.981661	3.38279
L, ANTINEOPLASTIC AND IMMUNOMODULATING AGENTS	Hormones	triptorelin	0.872837	1.17691
L, ANTINEOPLASTIC AND IMMUNOMODULATING AGENTS	Immunosuppressants	leflunomide	0.947709	4.75732
L, ANTINEOPLASTIC AND IMMUNOMODULATING AGENTS	Immunosuppressants	mycophenolic acid	0.633488	3.77761
L, ANTINEOPLASTIC AND IMMUNOMODULATING AGENTS	Immunosuppressants	voclosporin	0.984499	1.54897
L, ANTINEOPLASTIC AND IMMUNOMODULATING AGENTS	Other antineoplastic	alitretinoin	0.981829	2.21296
L, ANTINEOPLASTIC AND IMMUNOMODULATING AGENTS	Other antineoplastic	anagrelide	0.93491	3.35296
L, ANTINEOPLASTIC AND IMMUNOMODULATING AGENTS	Other antineoplastic	belinostat	0.988786	1.75347
L, ANTINEOPLASTIC AND IMMUNOMODULATING AGENTS	Other antineoplastic	bortezomib	0.819376	4.84748
L, ANTINEOPLASTIC AND IMMUNOMODULATING AGENTS	Other antineoplastic	cisplatin	0.846096	5.6697
L, ANTINEOPLASTIC AND IMMUNOMODULATING AGENTS	Other antineoplastic	panobinostat	0.977553	3.81136
L, ANTINEOPLASTIC AND IMMUNOMODULATING AGENTS	Other antineoplastic	procarbazine	0.970544	3.48412
L, ANTINEOPLASTIC AND IMMUNOMODULATING AGENTS	Other antineoplastic	romidepsin	0.993806	4.26013
L, ANTINEOPLASTIC AND IMMUNOMODULATING AGENTS	Protein kinase inhibitors	axitinib	0.975069	4.59769
L, ANTINEOPLASTIC AND IMMUNOMODULATING AGENTS	Protein kinase inhibitors	dasatinib	0.926108	2.17295
L, ANTINEOPLASTIC AND IMMUNOMODULATING AGENTS	Protein kinase inhibitors	erlotinib	0.940401	1.89271
L, ANTINEOPLASTIC AND IMMUNOMODULATING AGENTS	Protein kinase inhibitors	gefitinib	0.960339	1.67724
L, ANTINEOPLASTIC AND IMMUNOMODULATING AGENTS	Protein kinase inhibitors	midostaurin	0.932843	1.49332
M, MUSCULO-SKELETAL SYSTEM	Antigout preparations	colchicine	0.964326	2.02773
M, MUSCULO-SKELETAL SYSTEM	Antigout preparations	probenecid	0.945922	0.995728
M, MUSCULO-SKELETAL SYSTEM	Antiinflammatory, non steroids	etodolac	0.844777	1.88889
M, MUSCULO-SKELETAL SYSTEM	Antiinflammatory, non steroids	ibuprofen	0.777801	5.05927
M, MUSCULO-SKELETAL SYSTEM	Antiinflammatory, non steroids	ketoprofen	0.791695	3.48436
M, MUSCULO-SKELETAL SYSTEM	Antiinflammatory, non steroids	ketorolac	0.859059	2.70746
M, MUSCULO-SKELETAL SYSTEM	Antiinflammatory, non steroids	nabumetone	0.766011	3.98002
M, MUSCULO-SKELETAL SYSTEM	Antiinflammatory, non steroids	oxaprozin	0.857474	1.74152
M, MUSCULO-SKELETAL SYSTEM	Antiinflammatory, non steroids	parecoxib	0.949686	2.48767
M, MUSCULO-SKELETAL SYSTEM	Antiinflammatory, non steroids	piroxicam	0.851014	6.56667
M, MUSCULO-SKELETAL SYSTEM	Antiinflammatory, non steroids	suprofen	0.978316	2.79212
M, MUSCULO-SKELETAL SYSTEM	Drugs affecting bone	zoledronic acid	0.76892	3.73944
M, MUSCULO-SKELETAL SYSTEM	Muscle relaxants, centrally	methocarbamol	0.738912	3.50612
M, MUSCULO-SKELETAL SYSTEM	Muscle relaxants, directly	dantrolene	0.936639	4.93035
M, MUSCULO-SKELETAL SYSTEM	Muscle relaxants, peripherally	atracurium	0.967359	3.15572
M, MUSCULO-SKELETAL SYSTEM	Specific antirheumatic	penicillamine	0.960186	4.36001
M, MUSCULO-SKELETAL SYSTEM	Topical products for joint and muscle	felbinac	0.793723	3.58609
N, NERVOUS SYSTEM	Anesthetics, general	enflurane	0.941873	2.60877
N, NERVOUS SYSTEM	Anesthetics, general	ketamine	0.875819	3.94012
N, NERVOUS SYSTEM	Anesthetics, general	sufentanil	0.849517	2.34383
N, NERVOUS SYSTEM	Anesthetics, local	levobupivacaine	0.971949	4.02569
N, NERVOUS SYSTEM	Anticholinergic	orphenadrine	0.969798	3.61785
N, NERVOUS SYSTEM	Antidepressants	bupropion	0.862004	4.3787
N, NERVOUS SYSTEM	Antidepressants	desipramine	0.962806	4.18034
N, NERVOUS SYSTEM	Antidepressants	doxepin	0.858974	2.25628
N, NERVOUS SYSTEM	Antidepressants	duloxetine	0.904605	3.57103
N, NERVOUS SYSTEM	Antidepressants	escitalopram	0.890596	4.57048
N, NERVOUS SYSTEM	Antidepressants	isocarboxazid	0.989098	1.76066
N, NERVOUS SYSTEM	Antidepressants	mianserin	0.917911	4.55274
N, NERVOUS SYSTEM	Antidepressants	nortriptyline	0.834033	2.03703
N, NERVOUS SYSTEM	Antidepressants	phenelzine	0.965531	5.47396
N, NERVOUS SYSTEM	Antidepressants	protriptyline	0.945664	3.80188
N, NERVOUS SYSTEM	Antidepressants	trimipramine	0.952425	3.0939
N, NERVOUS SYSTEM	Antiepileptics	cannabidiol	0.950564	4.73759
N, NERVOUS SYSTEM	Antiepileptics	carbamazepine	0.814183	5.20206
N, NERVOUS SYSTEM	Antiepileptics	ethosuximide	0.954983	6.83661
N, NERVOUS SYSTEM	Antiepileptics	ganaxolone	0.993373	3.9243
N, NERVOUS SYSTEM	Antiepileptics	levetiracetam	0.74288	3.15276
N, NERVOUS SYSTEM	Antiepileptics	primidone	0.778114	2.07792
N, NERVOUS SYSTEM	Antiepileptics	rufinamide	0.958649	6.16026
N, NERVOUS SYSTEM	Antiepileptics	zonisamide	0.897612	2.84792
N, NERVOUS SYSTEM	Antimigraine	almotriptan	0.933577	4.25298
N, NERVOUS SYSTEM	Antimigraine	naratriptan	0.899286	2.74976
N, NERVOUS SYSTEM	Antimigraine	rizatriptan	0.88252	2.45099
N, NERVOUS SYSTEM	Antimigraine	sumatriptan	0.851372	3.14792
N, NERVOUS SYSTEM	Antimigraine	zolmitriptan	0.946822	2.21163
N, NERVOUS SYSTEM	Antipsychotics	amisulpride	0.951408	5.5954
N, NERVOUS SYSTEM	Antipsychotics	loxapine	0.958109	3.62906
N, NERVOUS SYSTEM	Antipsychotics	paliperidone	0.929213	4.52521
N, NERVOUS SYSTEM	Antipsychotics	perphenazine	0.878771	1.24723
N, NERVOUS SYSTEM	Antipsychotics	pimozide	0.975011	4.72743
N, NERVOUS SYSTEM	Antipsychotics	promazine	0.945245	4.98526
N, NERVOUS SYSTEM	Antipsychotics	zuclopenthixol	0.875715	6.60737
N, NERVOUS SYSTEM	Antivertigo	betahistine	0.936453	1.53668
N, NERVOUS SYSTEM	Anxiolytics	buspirone	0.947567	6.3172
N, NERVOUS SYSTEM	Anxiolytics	clobazam	0.889542	1.82344
N, NERVOUS SYSTEM	Anxiolytics	hydroxyzine	0.831394	4.55813
N, NERVOUS SYSTEM	Anxiolytics	lorazepam	0.874066	2.33916
N, NERVOUS SYSTEM	Dopaminergic	benserazide	0.944805	4.53614
N, NERVOUS SYSTEM	Dopaminergic	levodopa	0.820963	3.78375
N, NERVOUS SYSTEM	Dopaminergic	selegiline	0.958332	3.68455
N, NERVOUS SYSTEM	Dopaminergic	tolcapone	0.945436	3.52269
N, NERVOUS SYSTEM	Drugs for addictive disorders	acamprosate	0.831826	2.70825
N, NERVOUS SYSTEM	Drugs for addictive disorders	naltrexone	0.917599	4.37917
N, NERVOUS SYSTEM	Hypnotics and sedatives	dexmedetomidine	0.922883	4.05622
N, NERVOUS SYSTEM	Hypnotics and sedatives	melatonin	0.853319	3.73253
N, NERVOUS SYSTEM	Hypnotics and sedatives	ramelteon	0.890036	5.87578
N, NERVOUS SYSTEM	Hypnotics and sedatives	temazepam	0.85184	3.49121
N, NERVOUS SYSTEM	Hypnotics and sedatives	triazolam	0.918465	6.80928
N, NERVOUS SYSTEM	Hypnotics and sedatives	zaleplon	0.9384	3.32099
N, NERVOUS SYSTEM	Opioids	butorphanol	0.944471	2.09444
N, NERVOUS SYSTEM	Opioids	dihydrocodeine	0.853933	3.9049
N, NERVOUS SYSTEM	Opioids	pentazocine	0.880726	3.76032
N, NERVOUS SYSTEM	Opioids	tramadol	0.851566	4.04461
N, NERVOUS SYSTEM	Other analgesics	nefopam	0.89701	3.51437
N, NERVOUS SYSTEM	Other nervous	edaravone	0.947376	3.23798
N, NERVOUS SYSTEM	Parasympathomimetics	bethanechol	0.76623	1.19202
N, NERVOUS SYSTEM	Parasympathomimetics	neostigmine	0.891022	2.44003
N, NERVOUS SYSTEM	Parasympathomimetics	pyridostigmine	0.917259	2.21891
N, NERVOUS SYSTEM	Psychostimulants	atomoxetine	0.969415	2.36874
N, NERVOUS SYSTEM	Psychostimulants	dexmethylphenidate	0.926307	4.72602
P, ANTIPARASITIC PRODUCTS, INSECTICIDES AND REPELLENTS	Anti-Leishmaniasis and trypanosomiasis	fexinidazole	0.990638	3.26905
P, ANTIPARASITIC PRODUCTS, INSECTICIDES AND REPELLENTS	Anti-Leishmaniasis and trypanosomiasis	pentamidine	0.840428	3.12124
P, ANTIPARASITIC PRODUCTS, INSECTICIDES AND REPELLENTS	Antimalarials	hydroxychloroquine	0.740061	4.60705
P, ANTIPARASITIC PRODUCTS, INSECTICIDES AND REPELLENTS	Antimalarials	quinine	0.901544	2.76897
P, ANTIPARASITIC PRODUCTS, INSECTICIDES AND REPELLENTS	Antinematodals	albendazole	0.958333	1.53534
P, ANTIPARASITIC PRODUCTS, INSECTICIDES AND REPELLENTS	Antinematodals	pyrantel	0.951573	4.94136
P, ANTIPARASITIC PRODUCTS, INSECTICIDES AND REPELLENTS	Ectoparasiticides	disulfiram	0.96075	3.22946
P, ANTIPARASITIC PRODUCTS, INSECTICIDES AND REPELLENTS	Ectoparasiticides	permethrin	0.961367	1.19623
P, ANTIPARASITIC PRODUCTS, INSECTICIDES AND REPELLENTS	Other anti-protozoals	atovaquone	0.858212	3.03245
P, ANTIPARASITIC PRODUCTS, INSECTICIDES AND REPELLENTS	Other anti-protozoals	secnidazole	0.992267	3.66495
R, RESPIRATORY SYSTEM	Adrenergics, inhalant	terbutaline	0.921358	1.55417
R, RESPIRATORY SYSTEM	Antihistamines, systemic	acrivastine	0.954973	4.08536
R, RESPIRATORY SYSTEM	Antihistamines, systemic	brompheniramine	0.875084	1.51493
R, RESPIRATORY SYSTEM	Antihistamines, systemic	cetirizine	0.878023	6.38591
R, RESPIRATORY SYSTEM	Antihistamines, systemic	dimenhydrinate	0.907624	4.48355
R, RESPIRATORY SYSTEM	Antihistamines, systemic	diphenhydramine	0.804582	3.30465
R, RESPIRATORY SYSTEM	Antihistamines, systemic	fexofenadine	0.860079	4.00133
R, RESPIRATORY SYSTEM	Antihistamines, systemic	loratadine	0.833439	3.55167
R, RESPIRATORY SYSTEM	Antihistamines, systemic	pheniramine	0.928373	2.63383
R, RESPIRATORY SYSTEM	Antihistamines, systemic	promethazine	0.746021	3.12693
R, RESPIRATORY SYSTEM	Antihistamines, systemic	trimethobenzamide	0.71013	2.84963
R, RESPIRATORY SYSTEM	Cough suppressants	codeine	0.911572	5.9639
R, RESPIRATORY SYSTEM	Cough suppressants	hydrocodone	0.670954	2.20961
R, RESPIRATORY SYSTEM	Decongestans, systemic	pseudoephedrine	0.924886	3.4579
R, RESPIRATORY SYSTEM	Decongestans, topical	budesonide	0.773437	4.55081
R, RESPIRATORY SYSTEM	Decongestans, topical	ciclesonide	0.911914	2.85937
R, RESPIRATORY SYSTEM	Decongestans, topical	mupirocin	0.88254	2.58417
R, RESPIRATORY SYSTEM	Decongestans, topical	naphazoline	0.985649	1.80069
R, RESPIRATORY SYSTEM	Expectorants	mannitol	0.848651	2.42348
R, RESPIRATORY SYSTEM	Expectorants	mesna	0.783036	1.87244
R, RESPIRATORY SYSTEM	Other drugs for obstructive diseases	aminophylline	0.829217	3.4112
R, RESPIRATORY SYSTEM	Other drugs for obstructive diseases	montelukast	0.795799	3.13263
R, RESPIRATORY SYSTEM	Other drugs for obstructive diseases	theophylline	0.827015	4.50656
R, RESPIRATORY SYSTEM	Other drugs for obstructive diseases	zafirlukast	0.906997	4.20833
R, RESPIRATORY SYSTEM	Throat preparations	benzethonium	0.987777	3.31428
R, RESPIRATORY SYSTEM	Throat preparations	chlorhexidine	0.907045	7.18454
S, SENSORY ORGANS	Antiglaucoma	apraclonidine	0.987997	3.70691
S, SENSORY ORGANS	Antiglaucoma	bimatoprost	0.878708	1.70167
S, SENSORY ORGANS	Antiglaucoma	brimonidine	0.920454	1.83523
S, SENSORY ORGANS	Antiglaucoma	ecothiopate	1	4.1998
S, SENSORY ORGANS	Antiglaucoma	levobunolol	0.995737	1.99248
S, SENSORY ORGANS	Antiglaucoma	methazolamide	0.989691	4.92917
S, SENSORY ORGANS	Antiglaucoma	travoprost	0.928948	3.99418
S, SENSORY ORGANS	Antiinflammatory	bromfenac	1	1.62287
S, SENSORY ORGANS	Antiinflammatory	nepafenac	0.817495	6.41263
S, SENSORY ORGANS	Decongestants	emedastine	0.957036	4.25981
V, VARIOUS	All other therapeutics	calcium acetate	1	1.64239
V, VARIOUS	All other therapeutics	deferiprone	0.955851	1.49029
V, VARIOUS	All other therapeutics	deferoxamine	0.97146	4.35085
V, VARIOUS	All other therapeutics	dexrazoxane	0.807949	4.35575
V, VARIOUS	All other therapeutics	nitrogen	0.895276	2.53701
V, VARIOUS	Other diagnostics	urea	0.851549	3.54616
V, VARIOUS	Other nutrients	isoleucine	0.910877	4.75168

## Sheet: Table_S3
Table S3. Drugs classified as Pattern 3 (treatment environment–associated signals: low signal–label but high structure–signal alignment)
ATC level 1	ATC level 3	Drug	Yule's Q (x-axis)	Aligned Coordinate Distance (y-axis)
A, ALIMENTARY TRACT AND METABOLISM	Belladonna	hyoscyamine	-1	0.497842
A, ALIMENTARY TRACT AND METABOLISM	Blood glucose lowering drugs	miglitol	-1	0.809913
A, ALIMENTARY TRACT AND METABOLISM	Blood glucose lowering drugs	tolazamide	-1	0.541833
A, ALIMENTARY TRACT AND METABOLISM	Drugs for functional gastrointestinal disorders	mebeverine	-1	0.17746
A, ALIMENTARY TRACT AND METABOLISM	Intestinal antiinfectives	paromomycin	-1	0.617248
C, CARDIOVASCULAR SYSTEM	Antiadrenergic, ganglion-blocking	mecamylamine	-1	0.0347707
D, DERMATOLOGICALS	Corticosteroids	clobetasone	-1	0.628765
G, GENITO URINARY SYSTEM AND SEX HORMONES	Other gynecologicals	quinagolide	-1	0.76808
G, GENITO URINARY SYSTEM AND SEX HORMONES	Urologicals	phenazopyridine	-1	0.683785
H, SYSTEMIC HORMONAL PREPARATIONS, EXCL. SEX HORMONES AND INSULINS	Hypothalamic hormones	gonadorelin	-1	0.460977
J, ANTIINFECTIVES FOR SYSTEMIC USE	Penicillins	nafcillin	-1	0.246413
L, ANTINEOPLASTIC AND IMMUNOMODULATING AGENTS	Other antineoplastic	temoporfin	-1	0.223497
M, MUSCULO-SKELETAL SYSTEM	Antiinflammatory, non steroids	benzydamine	-1	0.735991
N, NERVOUS SYSTEM	Anesthetics, general	methohexital	-1	0.358943
N, NERVOUS SYSTEM	Anesthetics, local	chloroprocaine	-1	0.359705
N, NERVOUS SYSTEM	Anesthetics, local	dyclonine	-1	0.315203
N, NERVOUS SYSTEM	Other analgesics	salsalate	-1	0.177436
P, ANTIPARASITIC PRODUCTS, INSECTICIDES AND REPELLENTS	Antimalarials	artenimol	-1	0.516689
P, ANTIPARASITIC PRODUCTS, INSECTICIDES AND REPELLENTS	Ectoparasiticides	malathion	-1	0.364028
R, RESPIRATORY SYSTEM	Antihistamines, systemic	carbinoxamine	-1	0.254936
R, RESPIRATORY SYSTEM	Antihistamines, systemic	dexbrompheniramine	-1	0.343901
R, RESPIRATORY SYSTEM	Antihistamines, systemic	triprolidine	-1	0.188235
R, RESPIRATORY SYSTEM	Throat preparations	hexylresorcinol	-1	0.341244
V, VARIOUS	Other diagnostics	edrophonium	-1	0.419622

## Sheet: Table_S4
Table S4. Drugs classified as Pattern 4 (hidden risk: low signal–label and low structure–signal alignment)
ATC level 1	ATC level 3	Drug	Yule's Q (x-axis)	Aligned Coordinate Distance (y-axis)
A, ALIMENTARY TRACT AND METABOLISM	Anabolic steroids	oxandrolone	-1	1.98127
A, ALIMENTARY TRACT AND METABOLISM	Drugs for constipation	alvimopan	-1	4.54059
A, ALIMENTARY TRACT AND METABOLISM	Drugs for peptic ulcer and reflux	ranitidine	-1	1.8848
C, CARDIOVASCULAR SYSTEM	Cardiac stimulants	dopexamine	-1	1.27201
D, DERMATOLOGICALS	Antiseptics	propamidine	-1	1.93328
D, DERMATOLOGICALS	Antiseptics	silver nitrate	-1	3.00683
D, DERMATOLOGICALS	Chemotherapeutics, topical	mafenide	-1	2.8555
D, DERMATOLOGICALS	Corticosteroids	clocortolone	-1	3.46156
G, GENITO URINARY SYSTEM AND SEX HORMONES	Estrogens	diethylstilbestrol	-1	4.11932
G, GENITO URINARY SYSTEM AND SEX HORMONES	Gynecological antiinfectives	ciclopirox	-1	4.11257
J, ANTIINFECTIVES FOR SYSTEMIC USE	Other Beta-lactam	cefotetan	-1	2.94796
M, MUSCULO-SKELETAL SYSTEM	Antiinflammatory, non steroids	etoricoxib	-1	2.39636
M, MUSCULO-SKELETAL SYSTEM	Muscle relaxants, centrally	chlorzoxazone	-1	2.23245
N, NERVOUS SYSTEM	Anesthetics, local	mepivacaine	-1	2.57299
P, ANTIPARASITIC PRODUCTS, INSECTICIDES AND REPELLENTS	Other anti-protozoals	nitazoxanide	-1	3.34117
R, RESPIRATORY SYSTEM	Antihistamines, systemic	ketotifen	-1	3.80993
R, RESPIRATORY SYSTEM	Throat preparations	dichlorobenzyl alcohol	-1	5.3632
S, SENSORY ORGANS	Antiinflammatory	medrysone	-1	6.39925
S, SENSORY ORGANS	Decongestants	alcaftadine	-1	4.44923
S, SENSORY ORGANS	Diagnostic agents	fluorescein	-1	1.39725
V, VARIOUS	Cardiovascular system	ammonia	-1	5.76308
V, VARIOUS	Other nutrients	taurine	-1	1.02572
